# Supplementary material for: Single-cell spatial landscape of immunotherapy response reveals mechanisms of CXCL13 enhanced antitumor immunity
Source: PubMed Central journal article supplement — J Immunother Cancer. 2023 Feb 1;11(2):e005545. doi: 10.1136/jitc-2022-005545 (PMC9896310; doi:10.1136/jitc-2022-005545), 2023-02-01

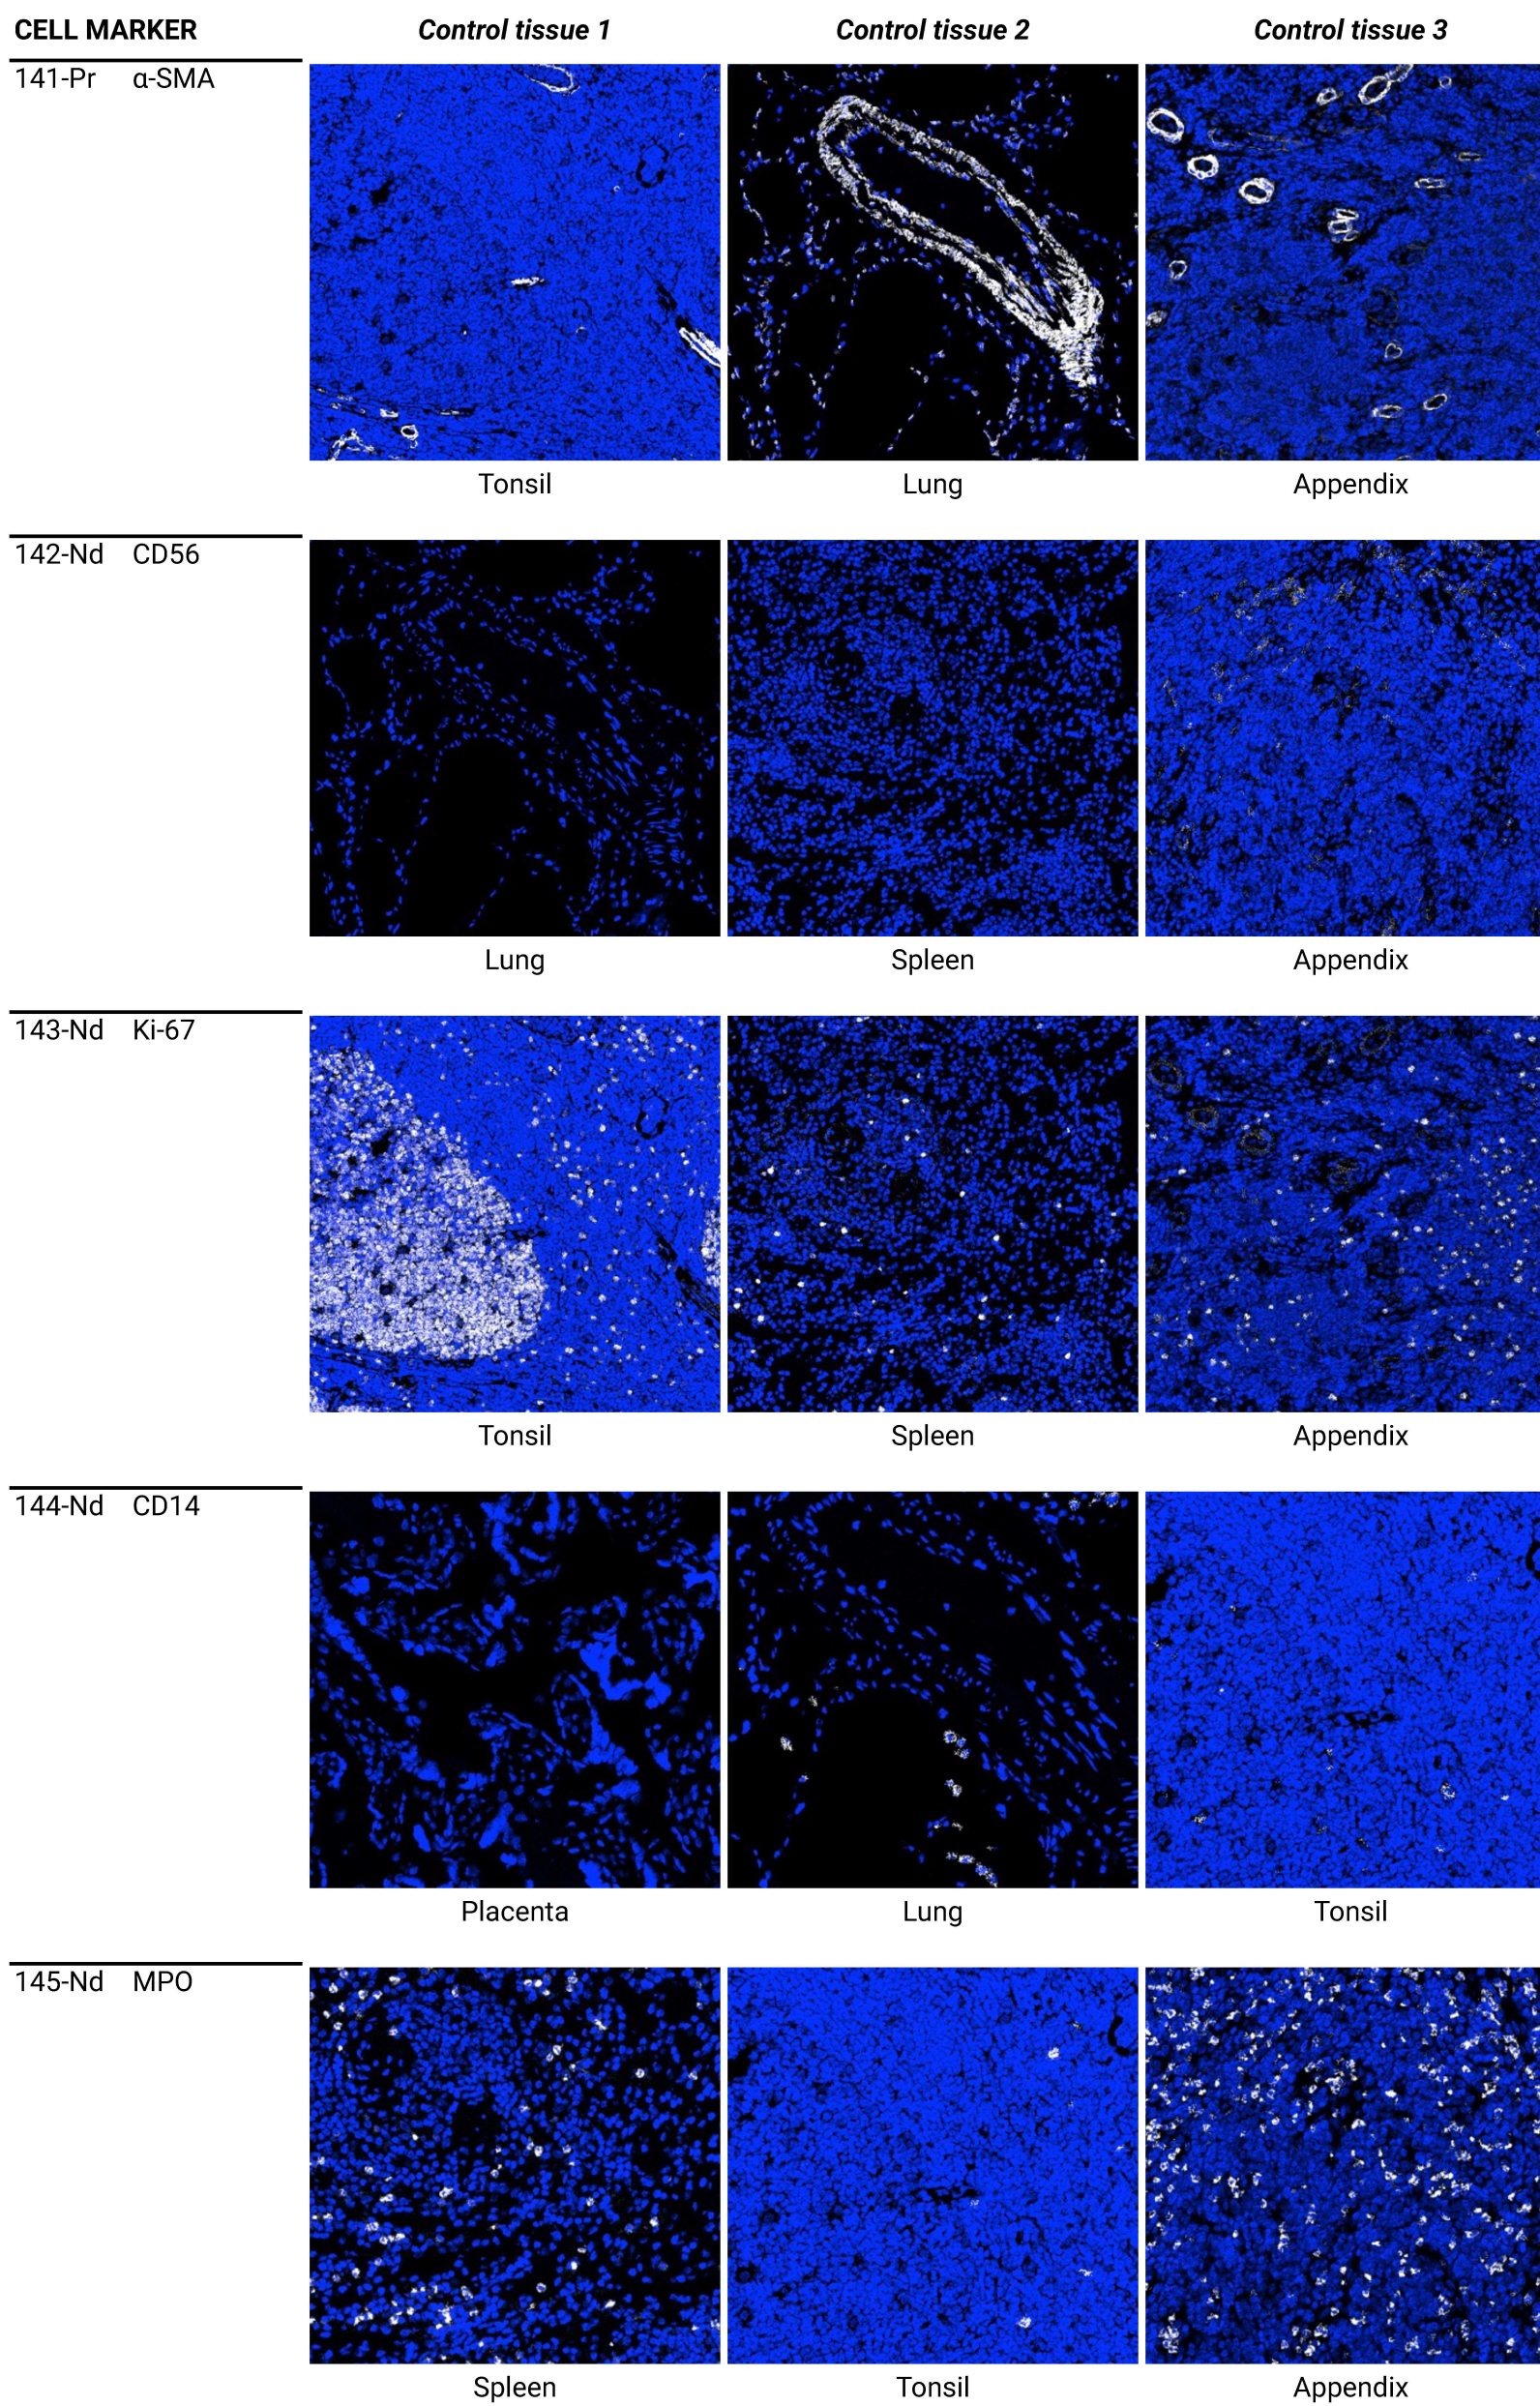



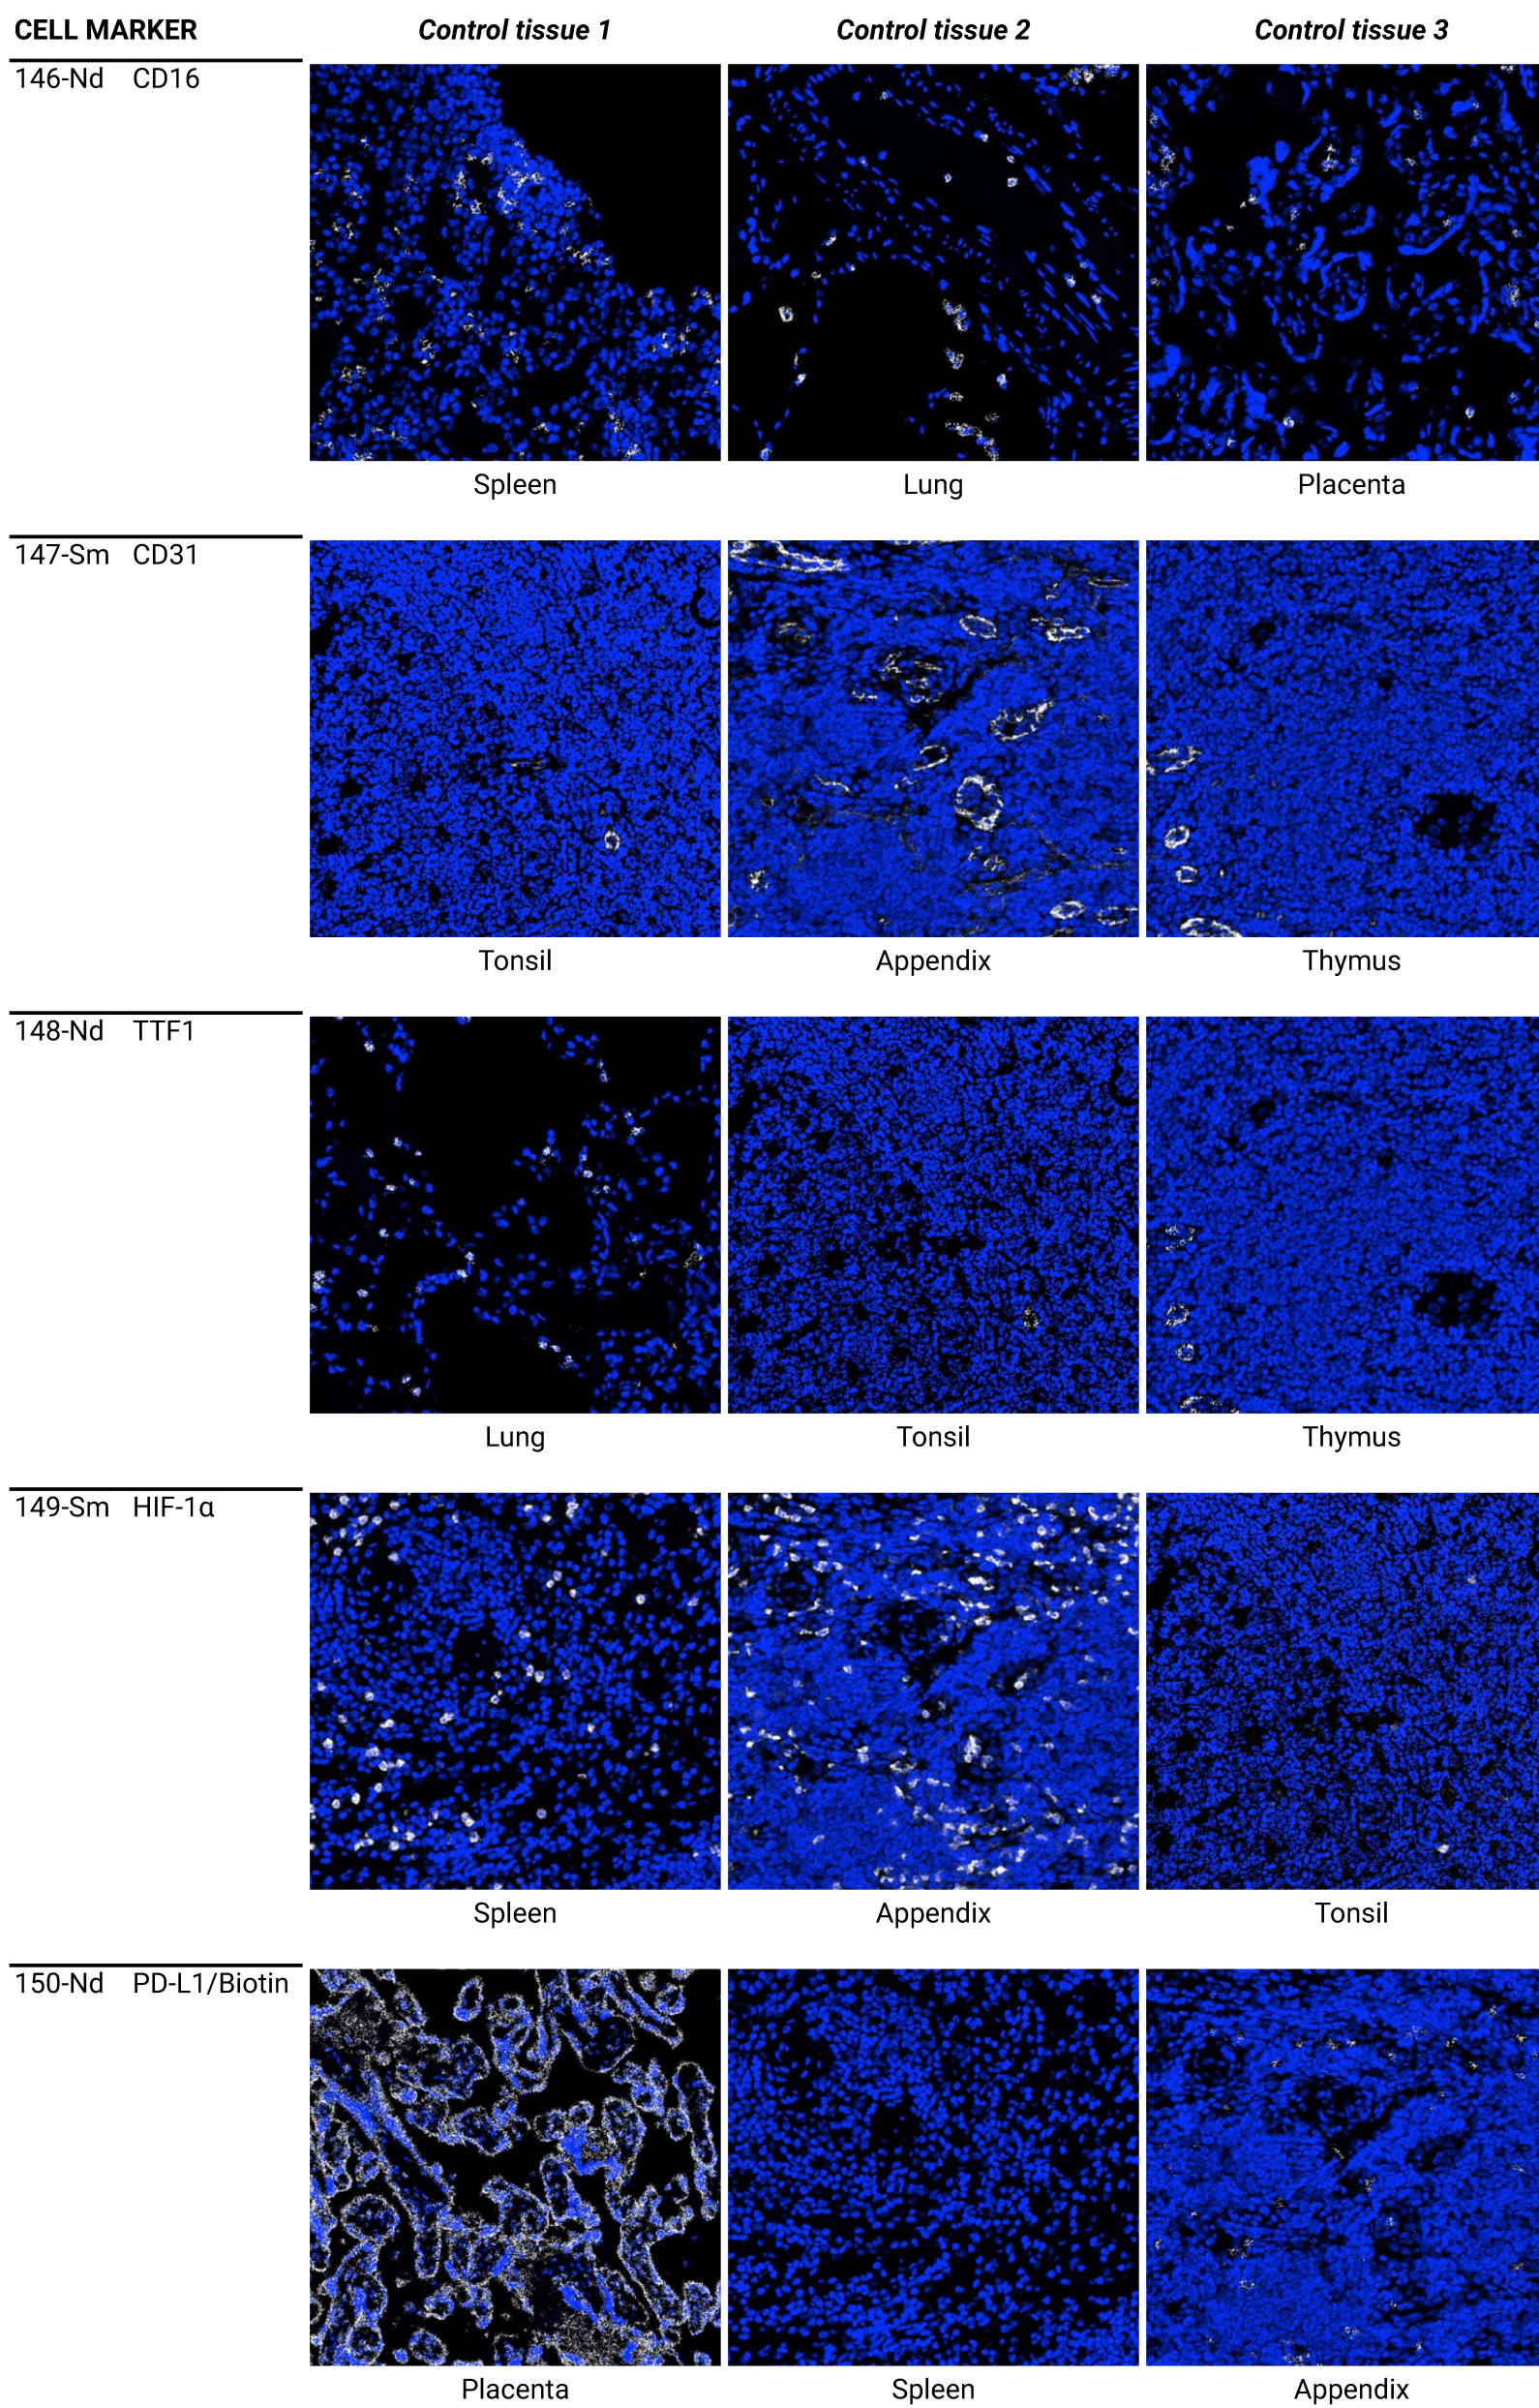



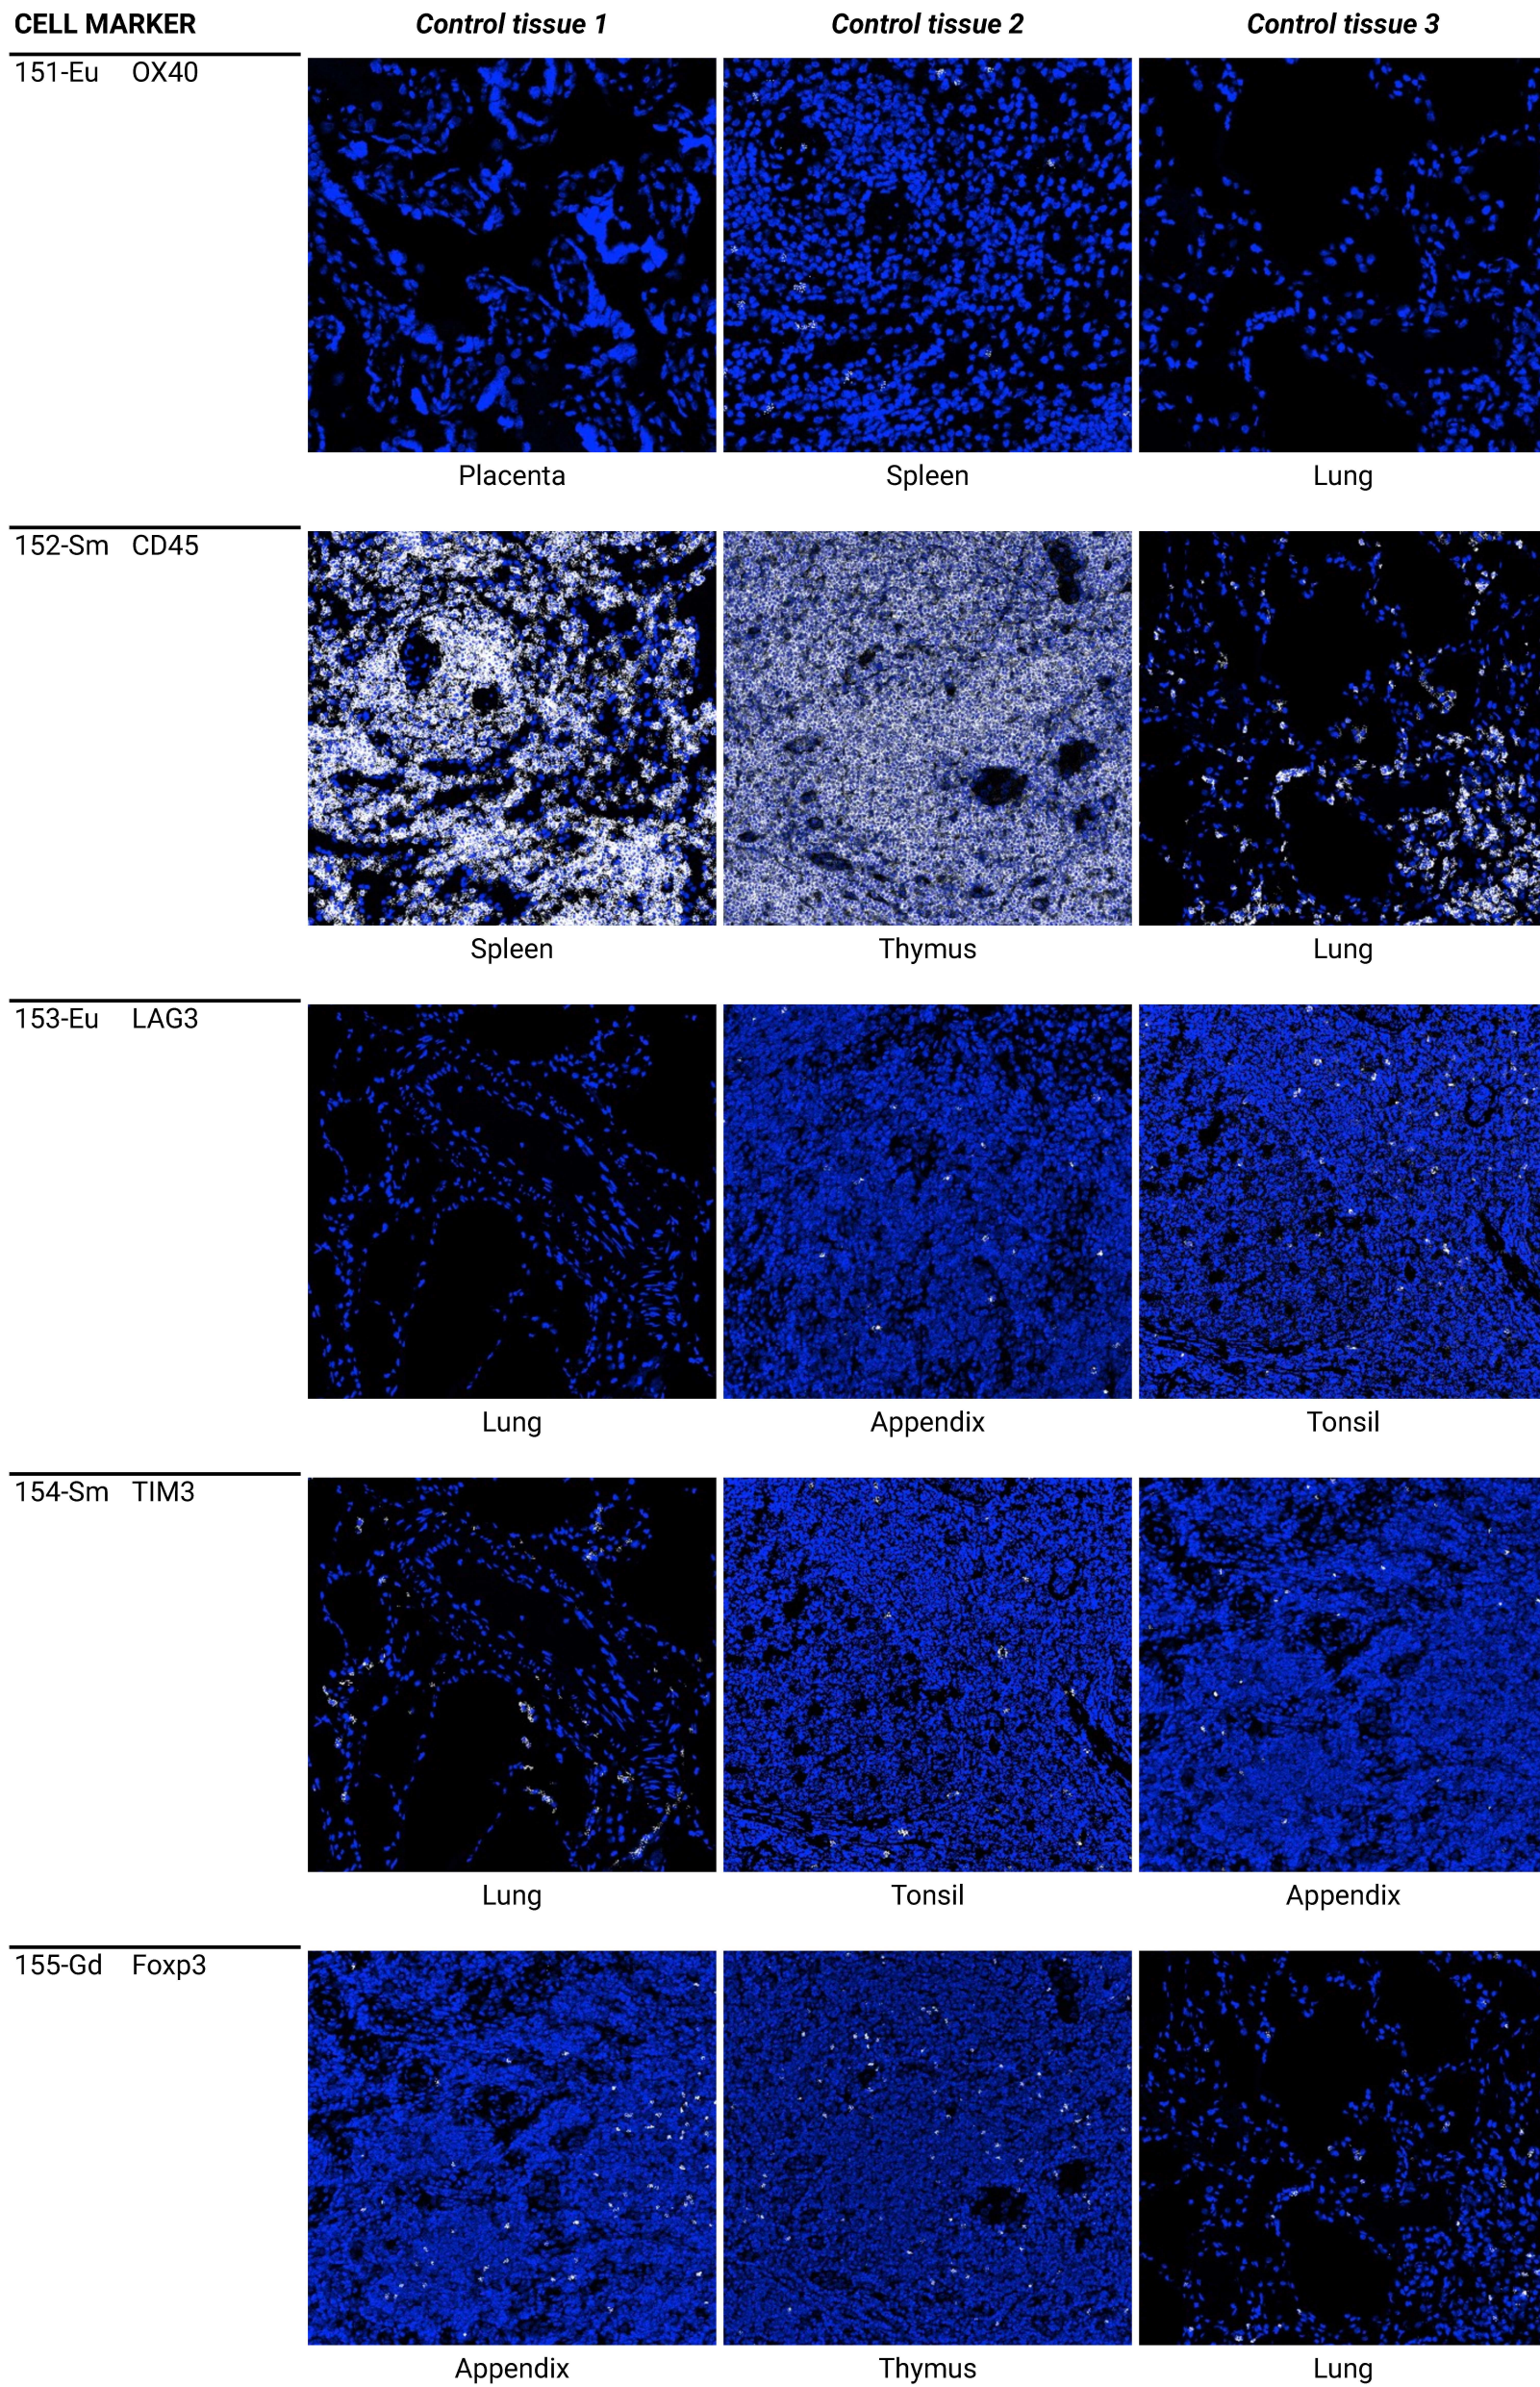



**CELL MARKER**

156-Gd CD4

**Control tissue 1**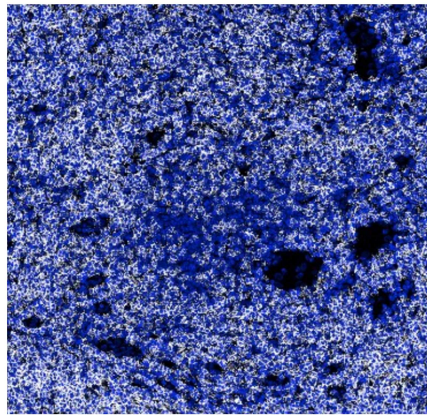

Thymus

**Control tissue 2**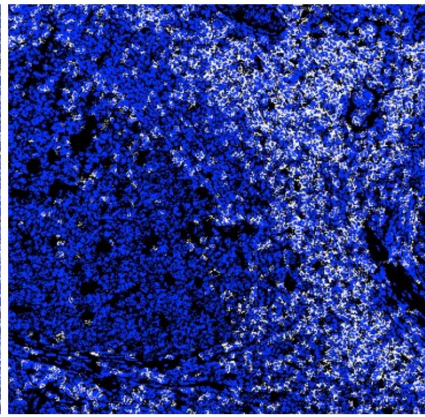

Tonsil

**Control tissue 3**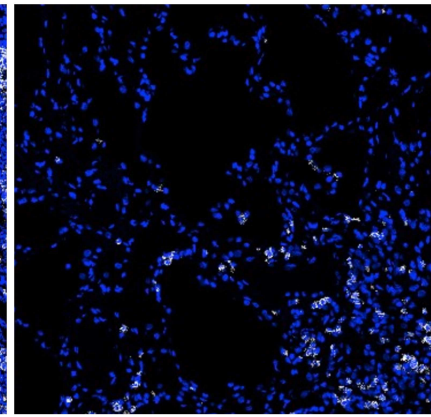

Lung

158-Gd CCR7

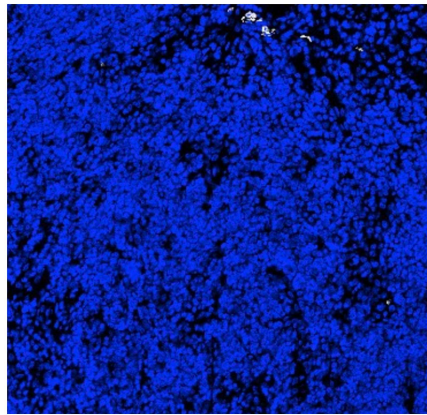

Appendix

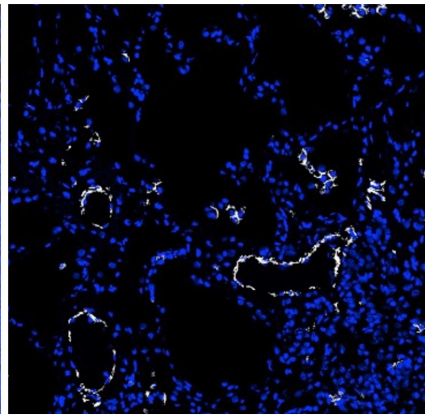

Lung

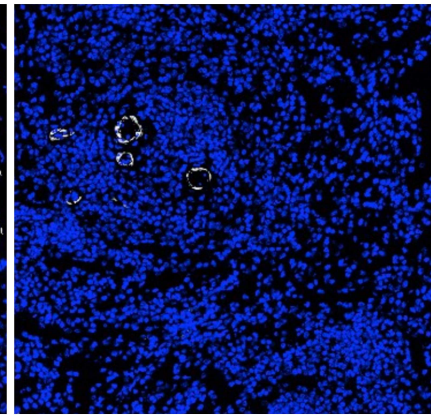

Spleen

159-Tb CD68

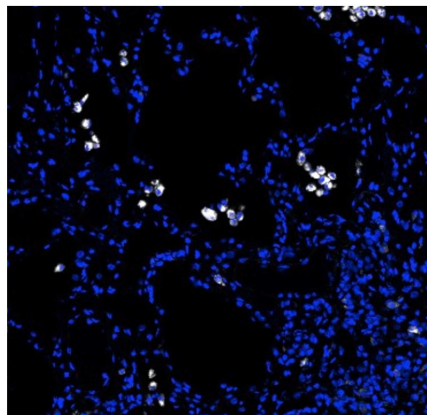

Lung

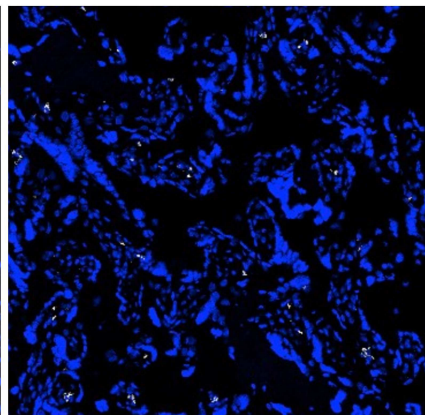

Placenta

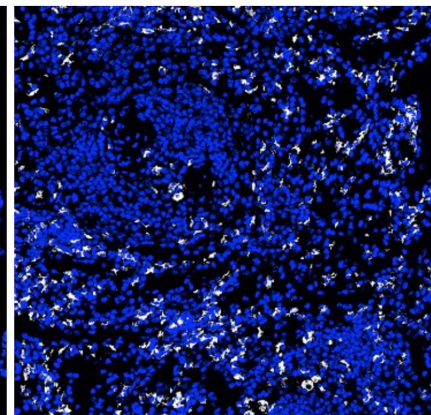

Spleen

160-Gd VISTA

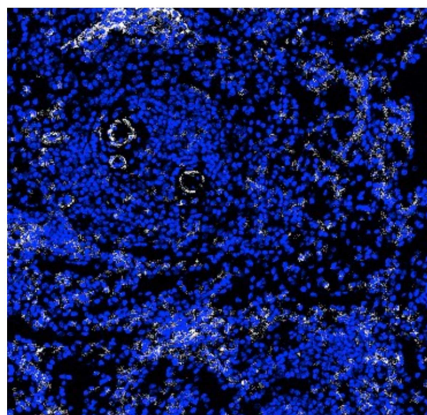

Spleen

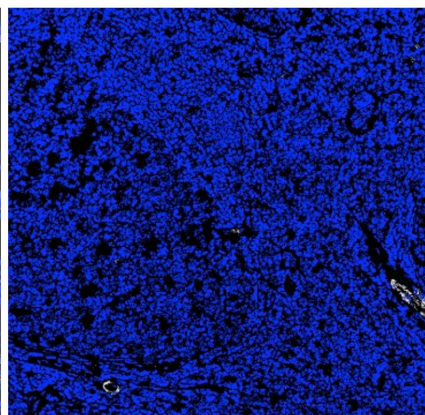

Tonsil

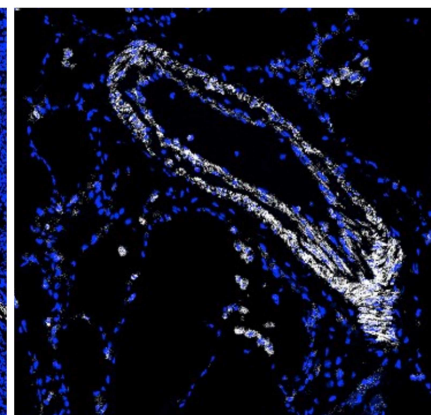

Lung

161-Dy CD20

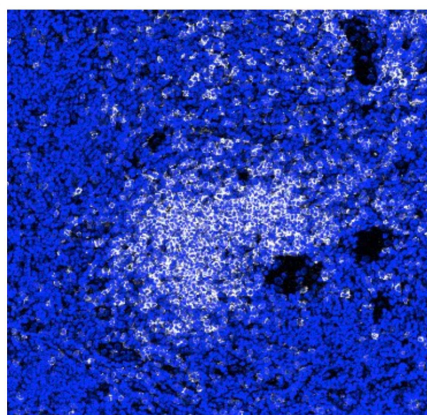

Thymus

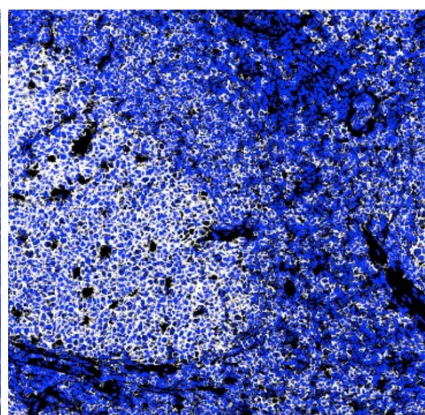

Tonsil

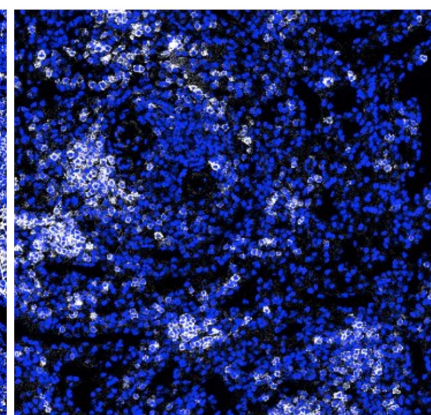

Spleen



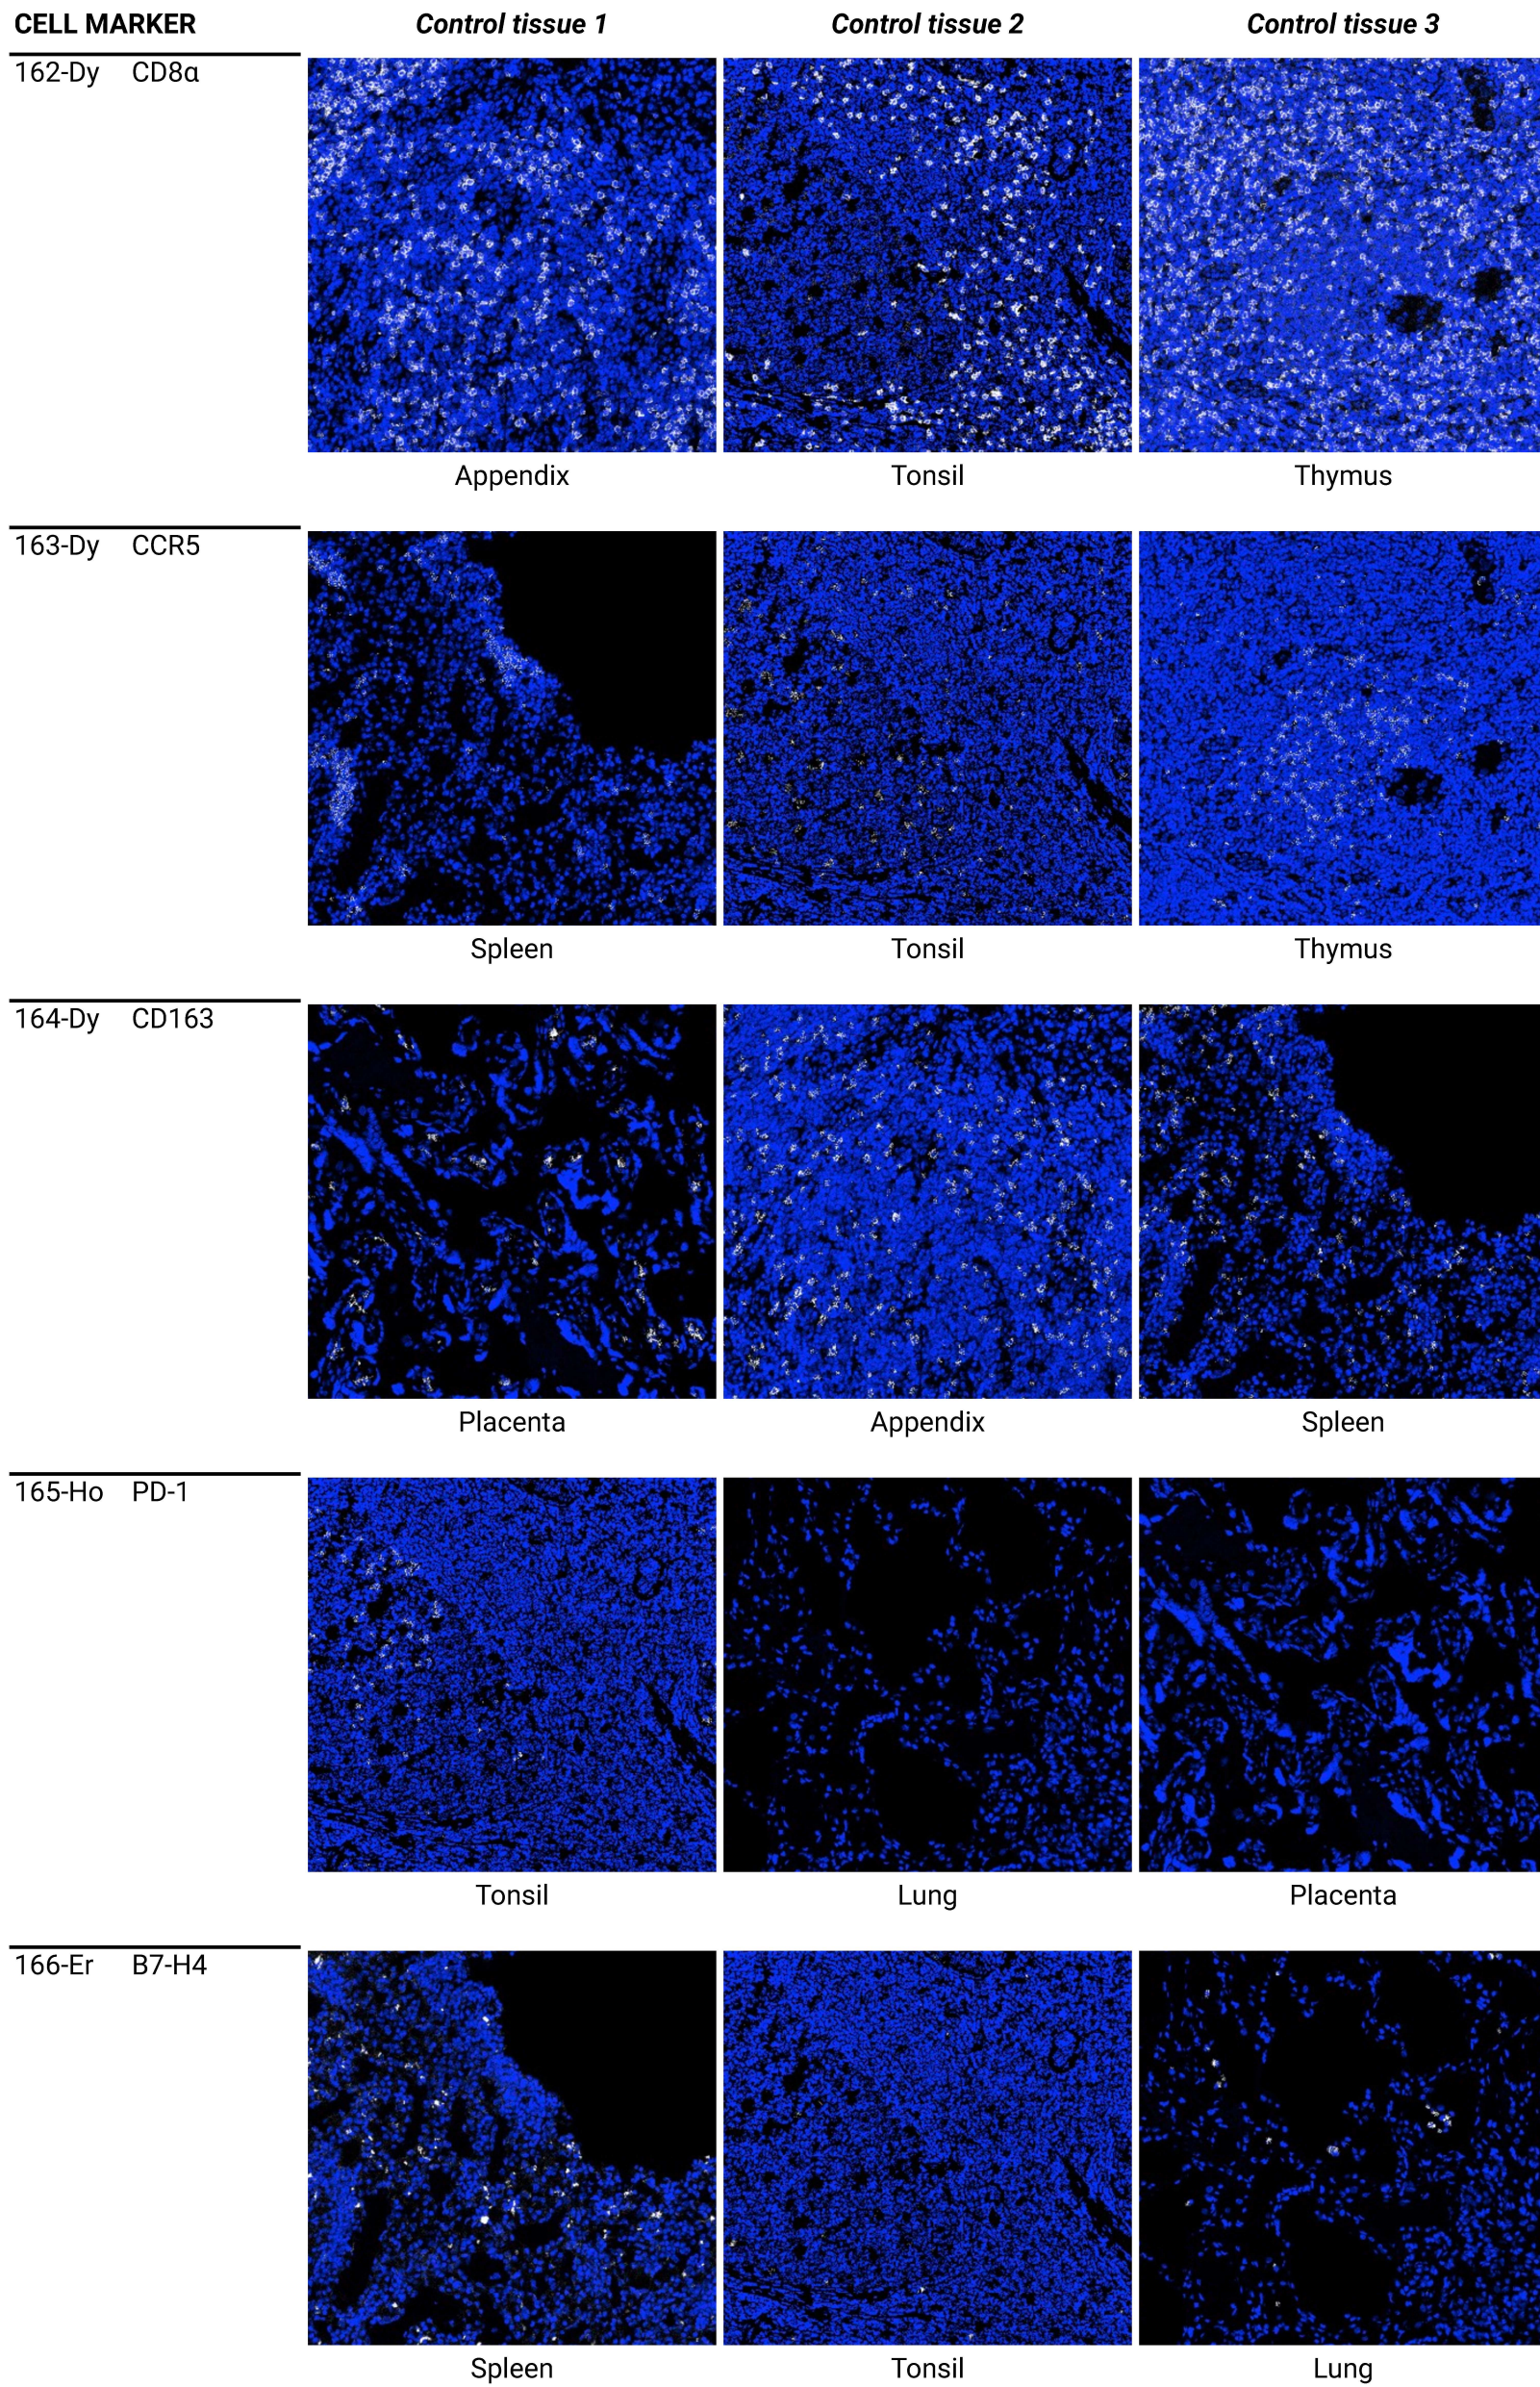



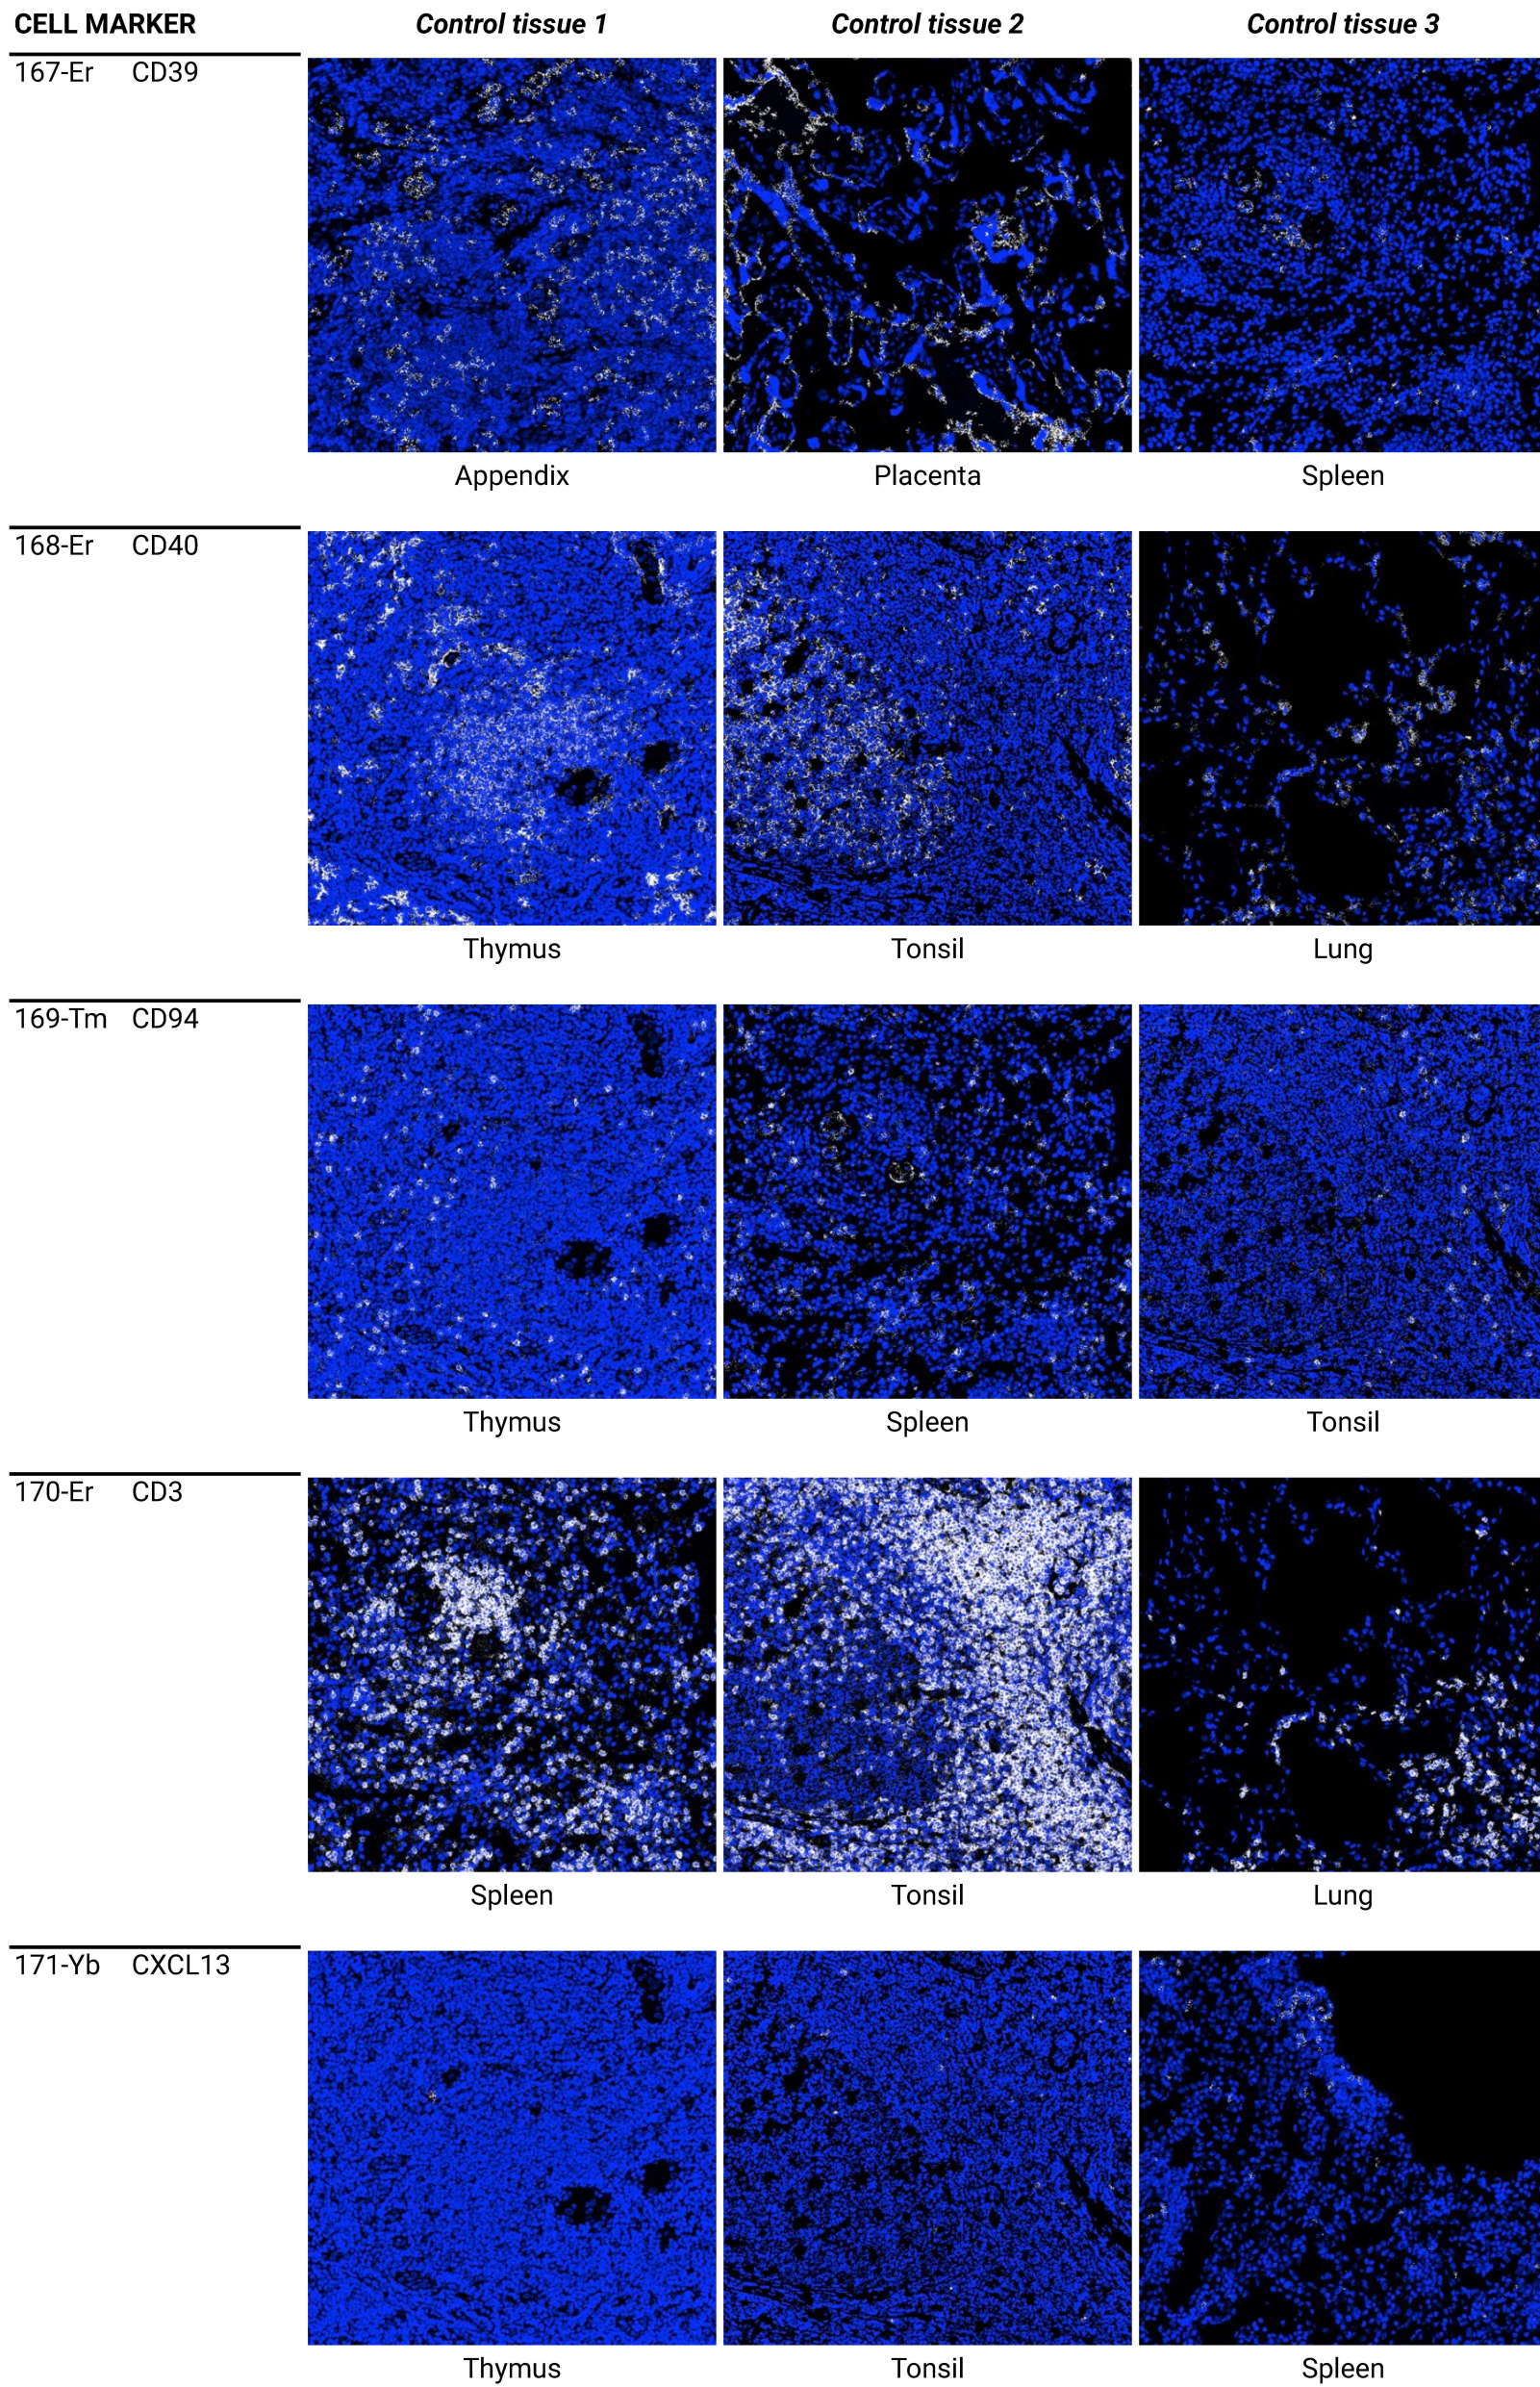



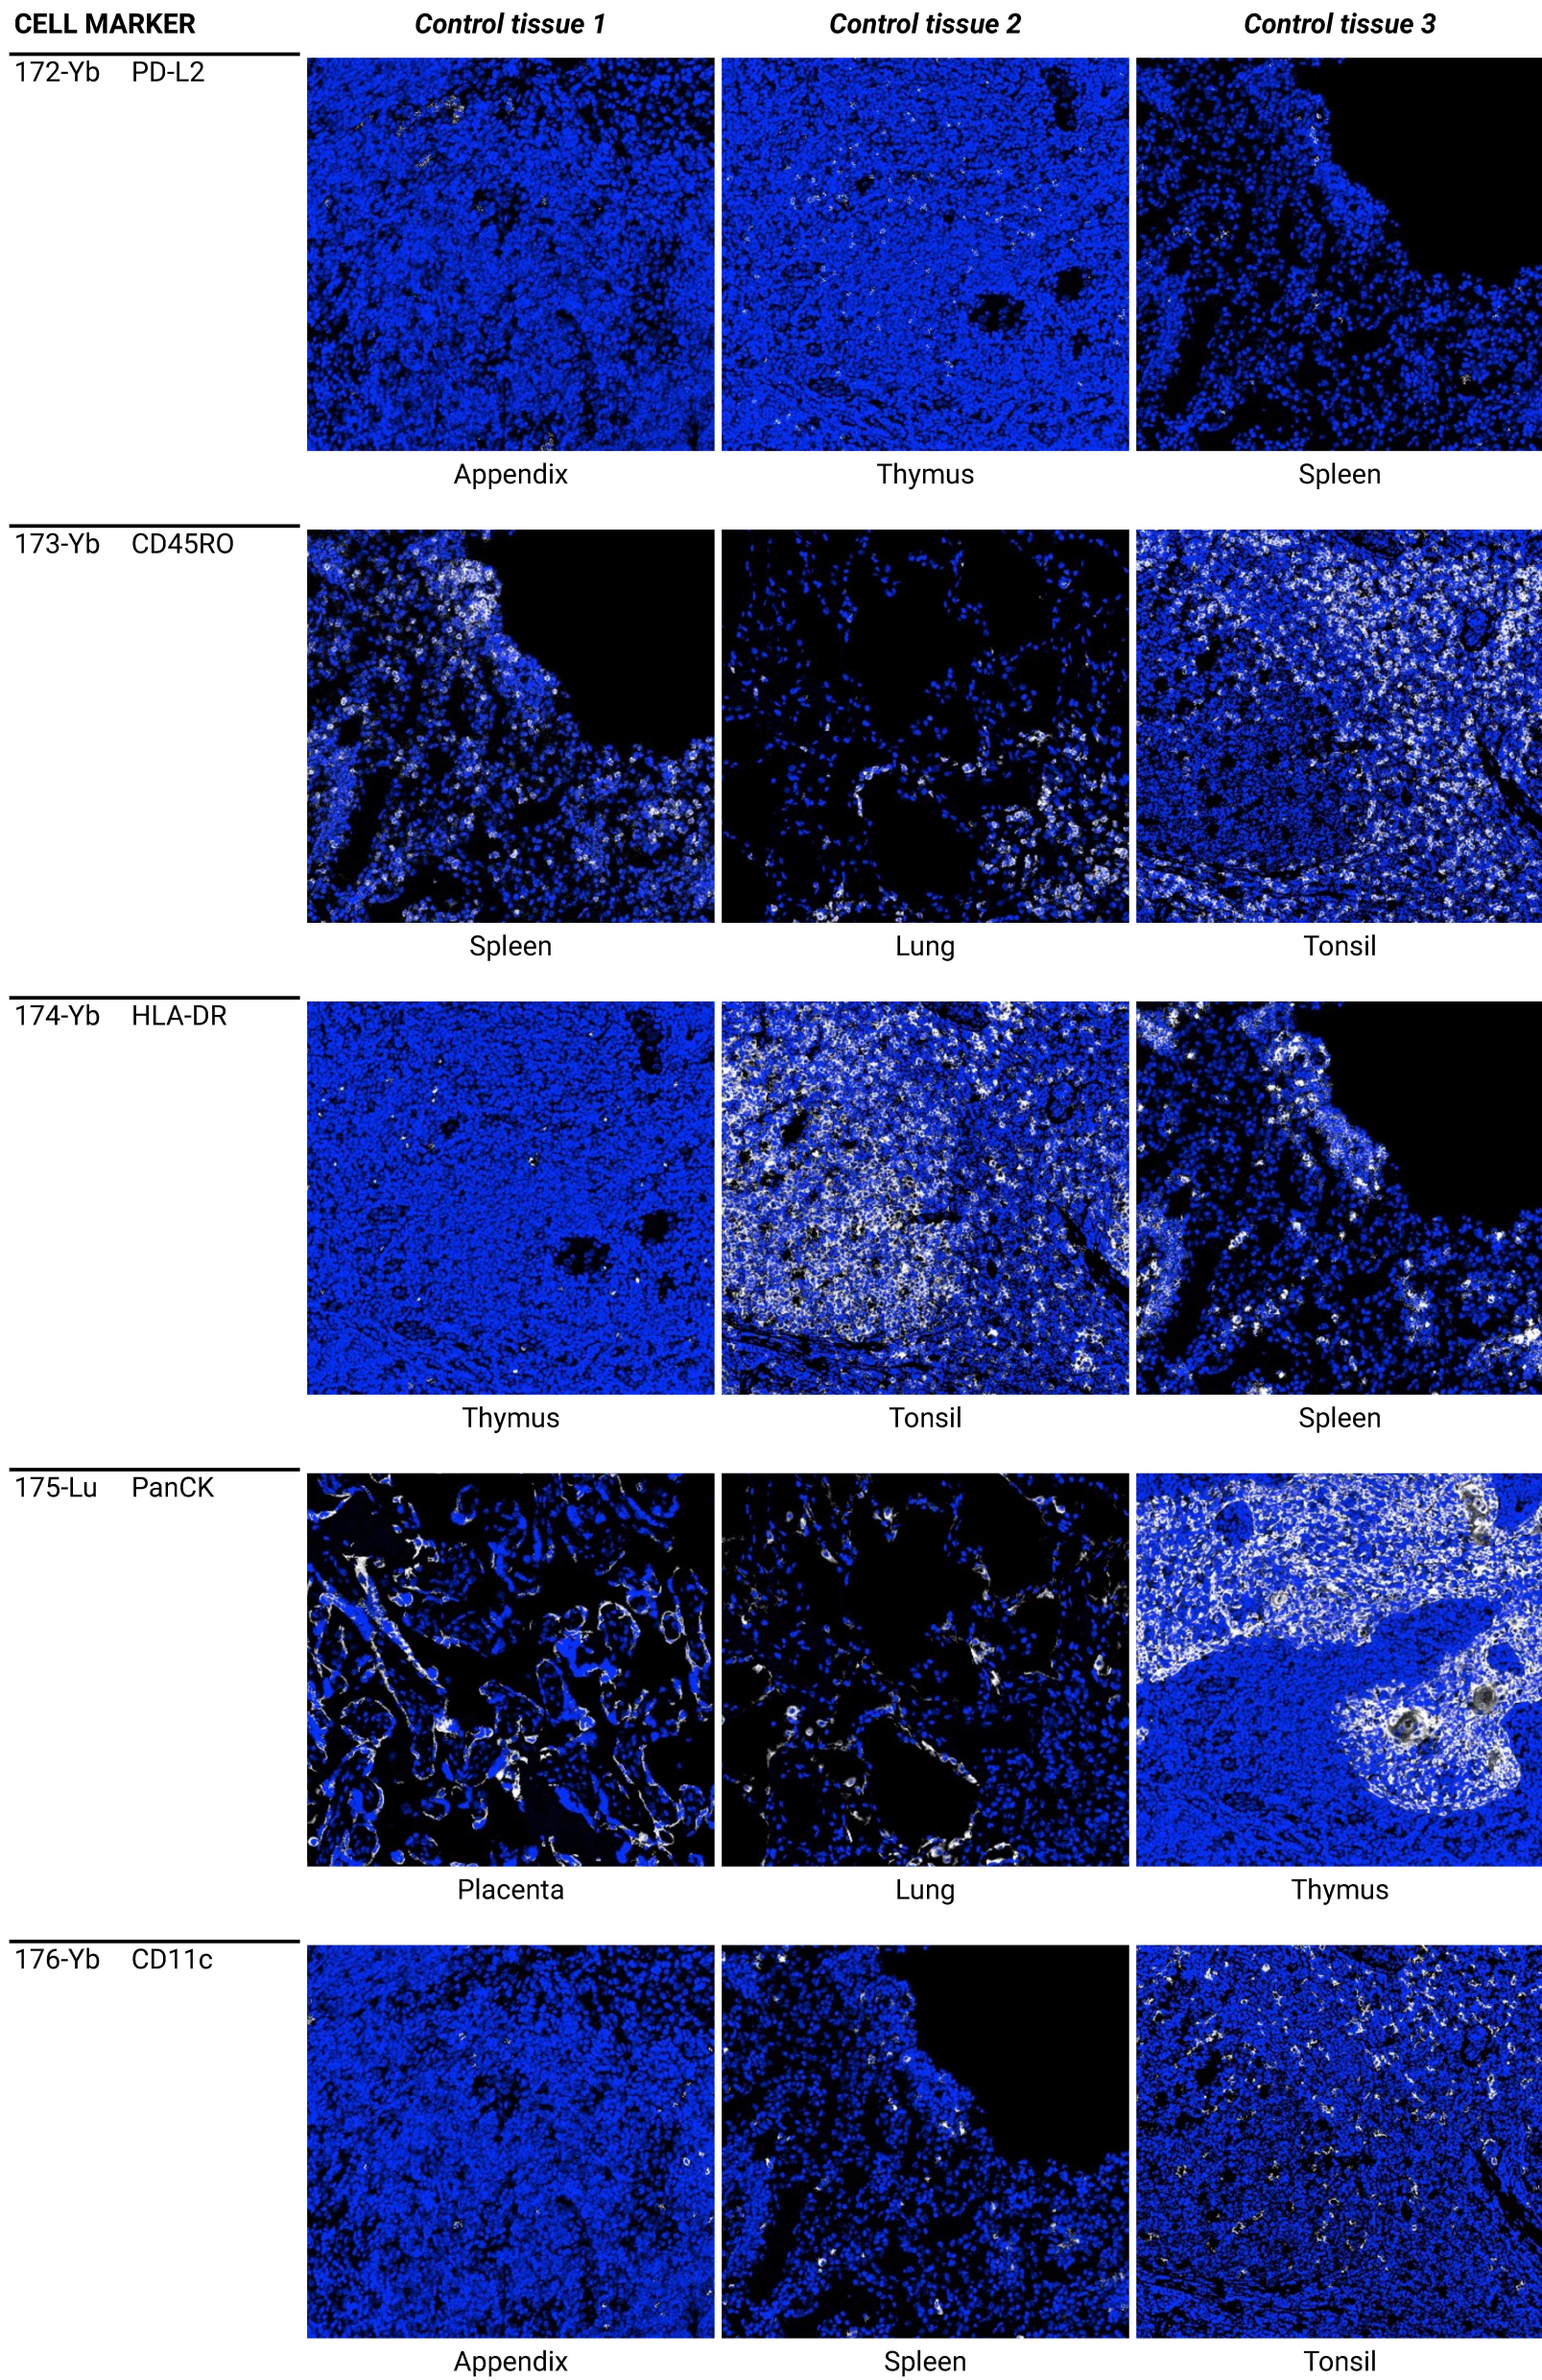



## Supplemental Figure S1

b

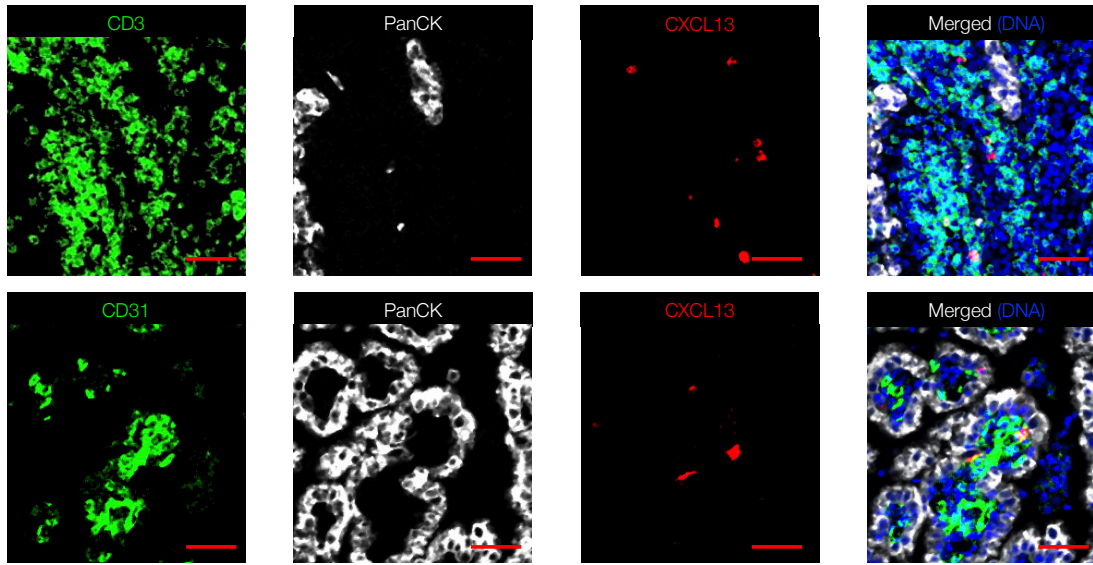

c

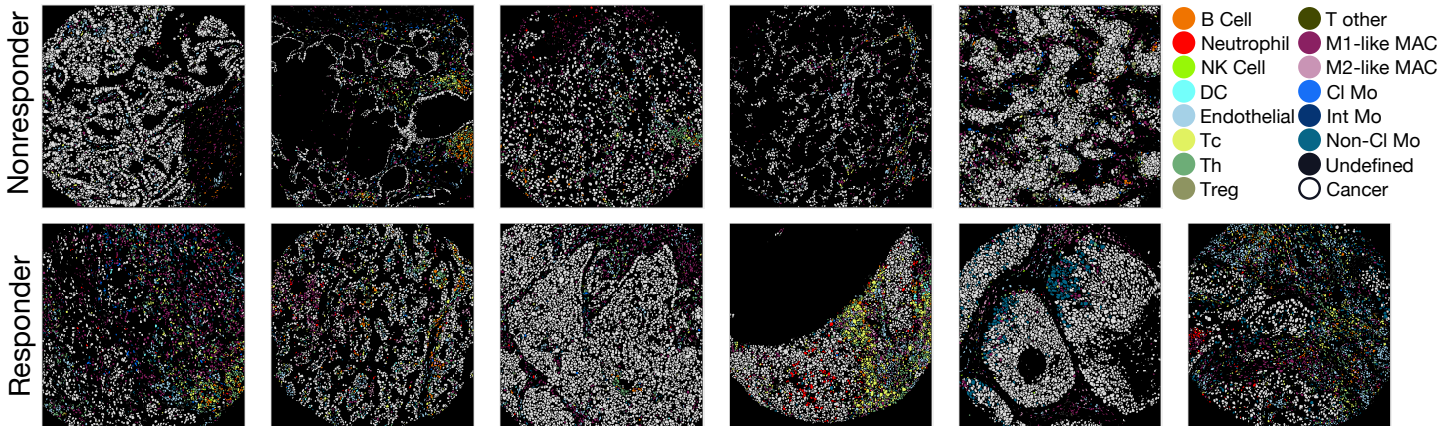

Supplement: jitc-2022-005545supp004.pdf [file jitc-2022-005545supp004.pdf]
