# Supplementary material for: Single-cell spatial landscape of immunotherapy response reveals mechanisms of CXCL13 enhanced antitumor immunity
Source: PubMed Central journal article supplement — J Immunother Cancer. 2023 Feb 1;11(2):e005545. doi: 10.1136/jitc-2022-005545 (PMC9896310; doi:10.1136/jitc-2022-005545), 2023-02-01
Supplement: jitc-2022-005545supp001.pdf [file jitc-2022-005545supp001.pdf]

**Supplemental Table 1. Cohort and clinicopathological data for lung cores.**

|                                                        | <b>Non-responders</b>        | <b>Responders</b>             |
|--------------------------------------------------------|------------------------------|-------------------------------|
| <b>Sex</b>                                             |                              |                               |
| Female                                                 | 3 (60.0%)                    | 0 (0%)                        |
| Male                                                   | 2 (40.0%)                    | 6 (100.0%)                    |
| <b>Age (<math>\pm</math> SD)</b>                       | 62.2 $\pm$ 8.8               | 69.0 $\pm$ 8.8                |
| <b>Smoking Status</b>                                  |                              |                               |
| Smoker                                                 | 5 (100.0%)                   | 6 (100.0%)                    |
| <b>Histology</b>                                       |                              |                               |
| Adenocarcinoma                                         | 5 (100.0%)                   | 4 (66.6%)                     |
| Squamous                                               | 0 (0%)                       | 2 (33.3%)                     |
| <b>Stage at diagnosis</b>                              |                              |                               |
| IA3                                                    | 1 (20.0%)                    | 0 (0%)                        |
| IIB                                                    | 0 (0%)                       | 2 (33.3%)                     |
| IIIA                                                   | 3 (60.0%)                    | 4 (66.6%)                     |
| IVA                                                    | 1 (20.0%)                    | 0 (0%)                        |
| <b>Specimen</b>                                        |                              |                               |
| Biopsy                                                 | 1 (20.0%)                    | 0 (0%)                        |
| Surgical resection                                     | 4 (80.0%)                    | 6 (100.0%)                    |
| <b>Radiation</b>                                       |                              |                               |
| Yes                                                    | 2 (40.0%)                    | 4 (66.6%)                     |
| No                                                     | 3 (60.0%)                    | 2 (33.3%)                     |
| <b>Chemotherapy</b>                                    |                              |                               |
| Yes                                                    | 5 (100.0%)                   | 6 (100.0%)                    |
| No                                                     | 0 (0%)                       | 0 (0%)                        |
| <b>Immunotherapy</b>                                   |                              |                               |
| Atezolizumab                                           | 1 (20.0%)                    | 1 (16.7%)                     |
| Nivolumab                                              | 4 (80.0%)                    | 2 (33.3%)                     |
| Pembrolizumab                                          | 0 (0%)                       | 3 (50.0%)                     |
| <b>Progression-free survival (<math>\pm</math> SD)</b> | 3.0 months $\pm$ 2.1 months  | 19.4 months $\pm$ 12.3 months |
| <b>Overall survival (<math>\pm</math> SD)</b>          | 10.0 months $\pm$ 7.0 months | 32.3 months $\pm$ 15.0 months |
