# Supplementary material for: Single-cell spatial landscape of immunotherapy response reveals mechanisms of CXCL13 enhanced antitumor immunity
Source: PubMed Central journal article supplement — J Immunother Cancer. 2023 Feb 1;11(2):e005545. doi: 10.1136/jitc-2022-005545 (PMC9896310; doi:10.1136/jitc-2022-005545), 2023-02-01
Supplement: jitc-2022-005545supp002.pdf [file jitc-2022-005545supp002.pdf]

Supplemental Table 2. Cohort and clinicopathological data for metastasis cores.

|                                                        | Non-responders                | Responders                    |
|--------------------------------------------------------|-------------------------------|-------------------------------|
| <b>Sex</b>                                             |                               |                               |
| Female                                                 | 4 (50.0%)                     | 6 (75.0%)                     |
| Male                                                   | 4 (50.0%)                     | 2 (25.0%)                     |
| <b>Age (<math>\pm</math> SD)</b>                       | 65.1 $\pm$ 6.4                | 67.5 $\pm$ 4.8                |
| <b>Smoking Status</b>                                  |                               |                               |
| Smoker                                                 | 7 (87.5%)                     | 8 (100.0%)                    |
| Non-smoker                                             | 1 (12.5%)                     | 0 (0%)                        |
| <b>Histology</b>                                       |                               |                               |
| Adenocarcinoma                                         | 6 (75.0%)                     | 7 (87.5%)                     |
| Squamous                                               | 1 (12.5%)                     | 1 (12.5%)                     |
| Other                                                  | 1 (12.5%)                     | 0 (0%)                        |
| <b>Stage at diagnosis</b>                              |                               |                               |
| IA2                                                    | 0 (0%)                        | 1 (12.5%)                     |
| IB                                                     | 3 (37.5%)                     | 1 (12.5%)                     |
| IIA                                                    | 0 (0%)                        | 2 (25.0%)                     |
| IIB                                                    | 1 (12.5%)                     | 1 (12.5%)                     |
| IIIA                                                   | 3 (37.5%)                     | 2 (25.0%)                     |
| IIIB                                                   | 1 (12.5%)                     | 0 (0%)                        |
| IVA                                                    | 0 (0%)                        | 1 (12.5%)                     |
| <b>Specimen</b>                                        |                               |                               |
| Biopsy                                                 | 5 (62.5%)                     | 1 (12.5%)                     |
| Surgical resection                                     | 0 (0%)                        | 2 (25.0%)                     |
| Cytology                                               | 3 (37.5%)                     | 5 (62.5%)                     |
| <b>Site</b>                                            |                               |                               |
| Distant Metastasis                                     | 5 (62.5%)                     | 3 (37.5%)                     |
| Lymph Node                                             | 2 (25.0%)                     | 4 (50.0%)                     |
| Pleural Effusion                                       | 1 (12.5%)                     | 1 (12.5%)                     |
| <b>Radiation</b>                                       |                               |                               |
| Yes                                                    | 2 (25.0%)                     | 3 (37.5%)                     |
| No                                                     | 6 (75.0%)                     | 5 (62.5%)                     |
| <b>Chemotherapy</b>                                    |                               |                               |
| Yes                                                    | 6 (75.0%)                     | 3 (37.5%)                     |
| No                                                     | 2 (25.0%)                     | 5 (62.5%)                     |
| <b>Immunotherapy</b>                                   |                               |                               |
| Atezolizumab                                           | 0 (0%)                        | 1 (12.5%)                     |
| Nivolumab                                              | 2 (25.0%)                     | 1 (12.5%)                     |
| Pembrolizumab                                          | 6 (75.0%)                     | 6 (75.0%)                     |
| <b>Progression-free survival (<math>\pm</math> SD)</b> | 36.2 months $\pm$ 27.5 months | 90.2 months $\pm$ 48.9 months |
| <b>Overall survival (<math>\pm</math> SD)</b>          | 41.1 months $\pm$ 26.0 months | 95.3 months $\pm$ 46.3 months |
