# Supplementary material for: Single-cell spatial landscape of immunotherapy response reveals mechanisms of CXCL13 enhanced antitumor immunity
Source: PubMed Central journal article supplement — J Immunother Cancer. 2023 Feb 1;11(2):e005545. doi: 10.1136/jitc-2022-005545 (PMC9896310; doi:10.1136/jitc-2022-005545), 2023-02-01
Supplement: jitc-2022-005545supp003.pdf [file jitc-2022-005545supp003.pdf]

**Supplemental Table 3. Imaging mass cytometry antibody panel.**

| <b>Metal</b> | <b>Marker</b>  | <b>Clone</b> | <b>Dilutions</b> |
|--------------|----------------|--------------|------------------|
| 141Pr        | aSMA           | 1A4          | 1:100            |
| 142Nd        | CD56           | EP2567Y      | 1:100            |
| 143Nd        | Ki-67          | B56          | 1:100            |
| 144Nd        | CD14           | SP192        | 1:100            |
| 145Nd        | MPO            | EPR20257     | 1:100            |
| 146Nd        | CD16           | EPR16784     | 1:100            |
| 147Sm        | CD31           | EP3095       | 1:100            |
| 148Nd        | TTF1           | SP141        | 1:100            |
| 149Sm        | HIF-1a         | EP1215Y      | 1:100            |
| 150Nd        | PD-L1/Biotin   | E1L3N/1D4-C5 | 1:50             |
| 151Eu        | OX40           | SP195        | 1:100            |
| 152Sm        | CD45           | D9M8I        | 1:100            |
| 153Eu        | LAG3/CD223     | D2G40        | 1:50             |
| 154Sm        | TIM3/CD366     | D5D5R        | 1:50             |
| 155Gd        | Foxp3          | 236A/E7      | 1:50             |
| 156Gd        | CD4            | EPR6855      | 1:100            |
| 158Gd        | CCR7           | Y59          | 1:100            |
| 159Tb        | CD68           | KP1          | 1:50             |
| 160Gd        | VISTA/PD-1H    | D1L2G        | 1:100            |
| 161Dy        | CD20           | H1           | 1:100            |
| 162Dy        | CD8a           | C8/144B      | 1:50             |
| 163Dy        | CCR5           | 31374        | 1:100            |
| 164Dy        | CD163          | ab213612     | 1:100            |
| 165Ho        | PD-1           | EPR4877(2)   | 1:50             |
| 166Er        | B7-H4          | H74          | 1:100            |
| 167Er        | CD39           | EPR20627     | 1:100            |
| 168Er        | CD40           | EPR20540     | 1:50             |
| 169Tm        | CD94           | EPR21003     | 1:100            |
| 170Er        | CD3            | Polyclonal   | 1:50             |
| 171Yb        | CXCL13         | 53602        | 1:50             |
| 172Yb        | PD-L2          | 176611       | 1:50             |
| 173Yb        | CD45RO         | UCHL1        | 1:100            |
| 174Yb        | HLA-DR         | EPR3692      | 1:100            |
| 175Lu        | Pancytokeratin | AE1+AE3      | 1:100            |
| 176Yb        | CD11c          | EP1347Y      | 1:100            |
| 191Ir        | DNA1           | N/A          | 1:100            |
| 193Ir        | DNA2           | N/A          | 1:100            |
