# Supplementary material for: Single-cell spatial landscape of immunotherapy response reveals mechanisms of CXCL13 enhanced antitumor immunity
Source: PubMed Central journal article supplement — J Immunother Cancer. 2023 Feb 1;11(2):e005545. doi: 10.1136/jitc-2022-005545 (PMC9896310; doi:10.1136/jitc-2022-005545), 2023-02-01
Supplement: jitc-2022-005545supp005.pdf [file jitc-2022-005545supp005.pdf]

**Supplemental Table 4. Spectral flow cytometry antibody panel.**

| Marker           | Color         | Dilution      | Clone       | Supplier       |
|------------------|---------------|---------------|-------------|----------------|
| LIVE/DEAD        | Aqua          | 1:1000        | N/A         | Biolegend      |
| CD45             | APC/Fire 810  | 1:200         | 30-F11      | Biolegend      |
| CD3              | Spark YG 570  | 1:200         | 17A2        | Biolegend      |
| CD4              | PE/Fire 700   | 1:400         | GK1.5       | Biolegend      |
| CD8              | PE/Fire 640   | 1:200         | 53-6.7      | Biolegend      |
| FOXP3            | pacific blue  | 1:400         | MF-14       | Biolegend      |
| PD-1             | APC/Cy7       | 1:200         | 29F.1A12    | Biolegend      |
| LAG-3            | PE            | 1:100         | C9B7W       | Biolegend      |
| granzyme B       | AF647         | 5 ul per test | GB11        | Biolegend      |
| CD49d            | PE-Cy7        | 1:200         | R1-2        | Biolegend      |
| CD11a            | PerCP/Cy5.5   | 1:300         | M5/114.15.2 | Biolegend      |
| CD62L            | BV650         | 1:100         | MEL-14      | Biolegend      |
| CD69             | BV480         | 1:100         | H1.2F3      | BD Biosciences |
| CD19             | Pe-Cy5        | 1:100         | 6D5         | Biolegend      |
| NKp46            | BV711         | 1:200         | 29A1.4      | Biolegend      |
| CD11c            | BV750         | 1:200         | N418        | Biolegend      |
| I-A/I-E (MHC II) | APC           | 1:100         | M5/114.15.2 | Biolegend      |
| CD11b            | BV570         | 1:100         | M1/70       | Biolegend      |
| Ly6G             | AF700         | 1:400         | 1A8         | Biolegend      |
| Ly6C             | BV421         | 1:200         | HK1.4       | Biolegend      |
| CCR2             | FITC          | 1:100         | SA203G11    | Biolegend      |
| Ki67             | Pe/Dazzle 594 | 1:100         | 16A8        | Biolegend      |
