# Supplementary figures and images for: Single-cell spatial landscape of immunotherapy response reveals mechanisms of CXCL13 enhanced antitumor immunity
Source: PubMed Central journal article supplement — J Immunother Cancer. 2023 Feb 1;11(2):e005545. doi: 10.1136/jitc-2022-005545 (PMC9896310; doi:10.1136/jitc-2022-005545), 2023-02-01

**Supplemental Figure S2**

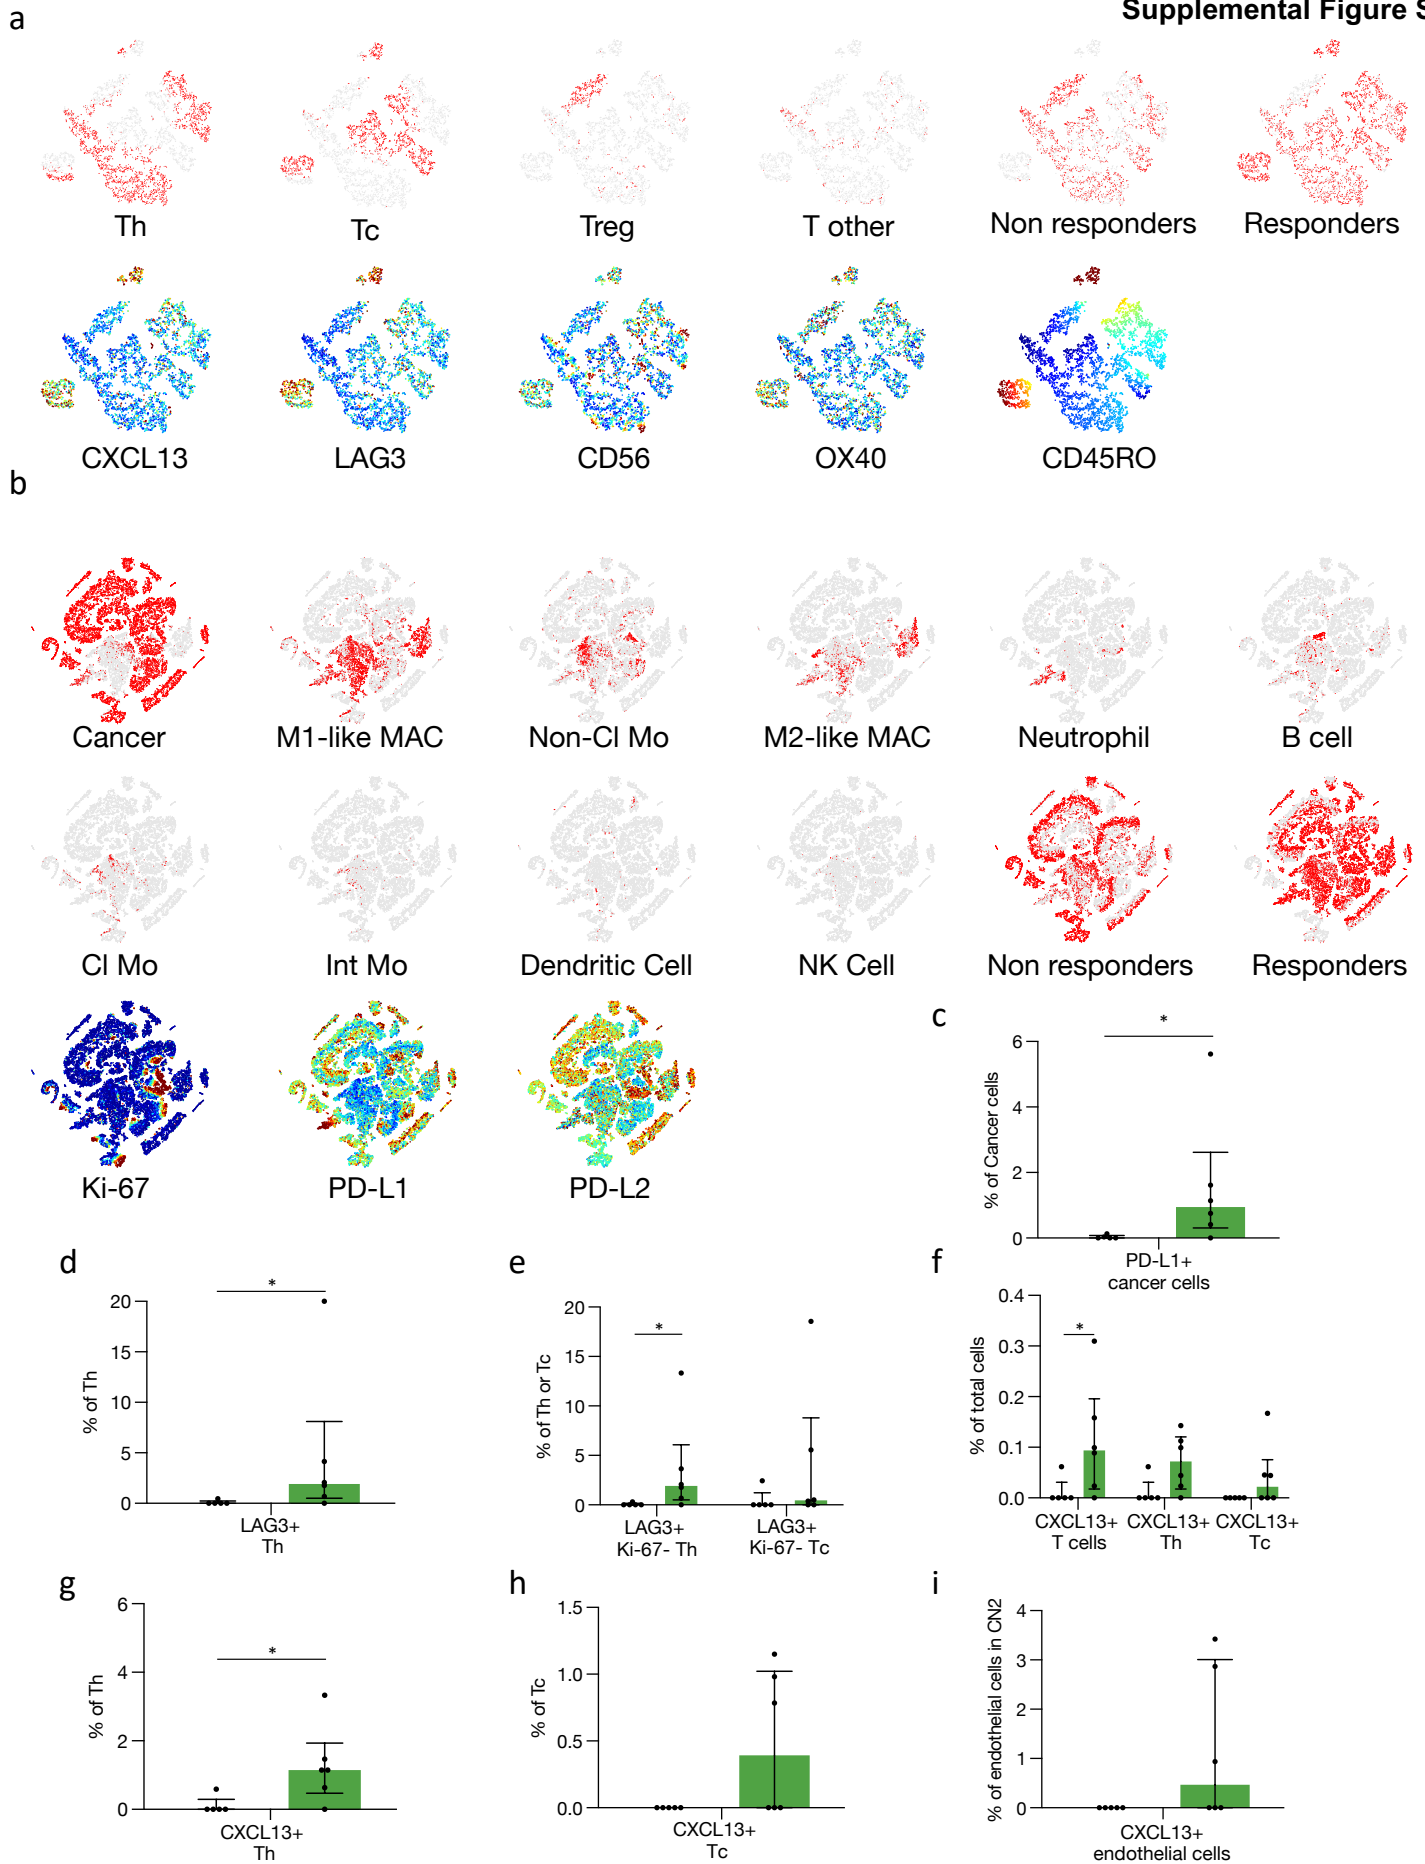

Supplement: jitc-2022-005545supp006.pdf [file jitc-2022-005545supp006.pdf]

**Supplemental Figure S3**

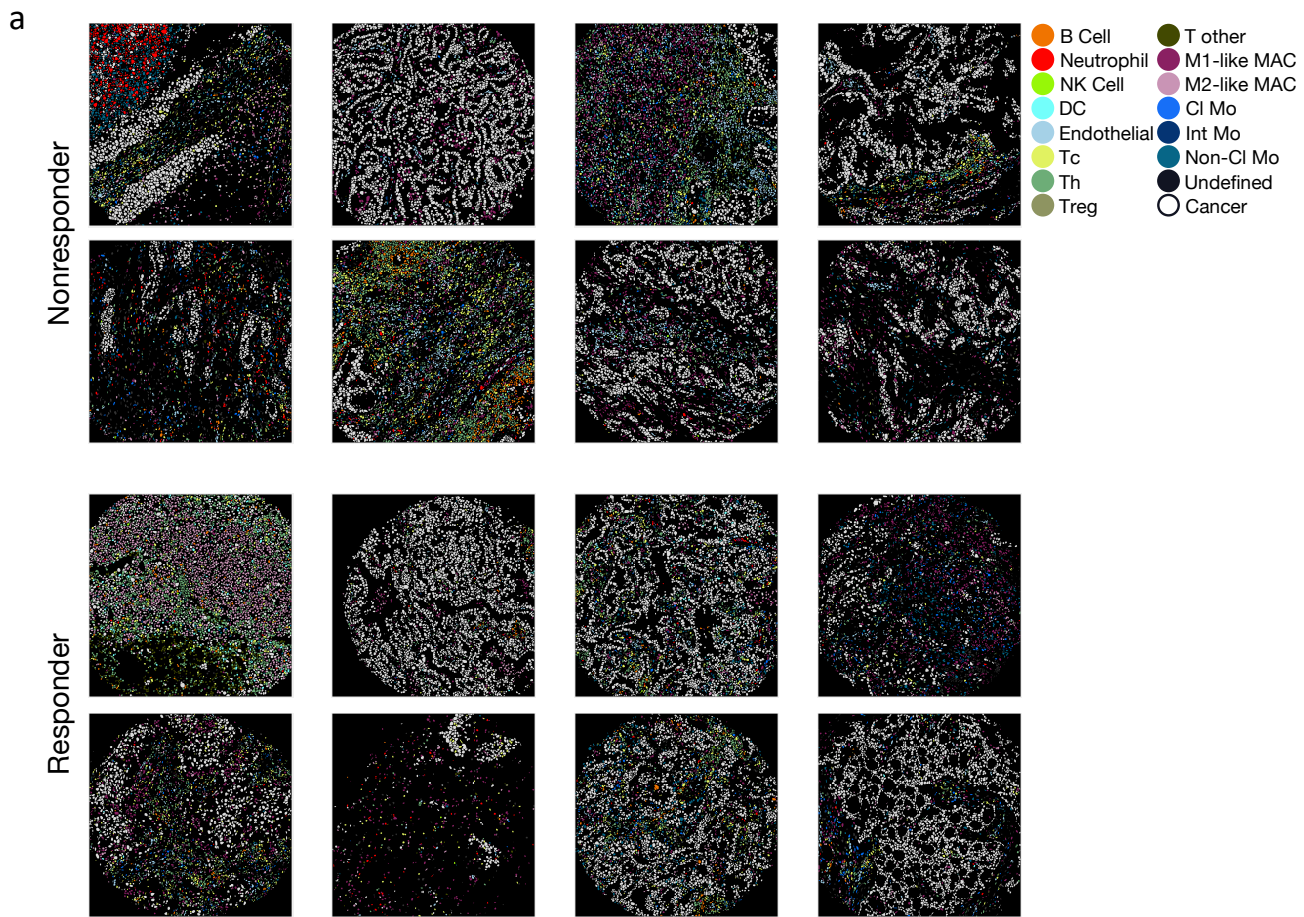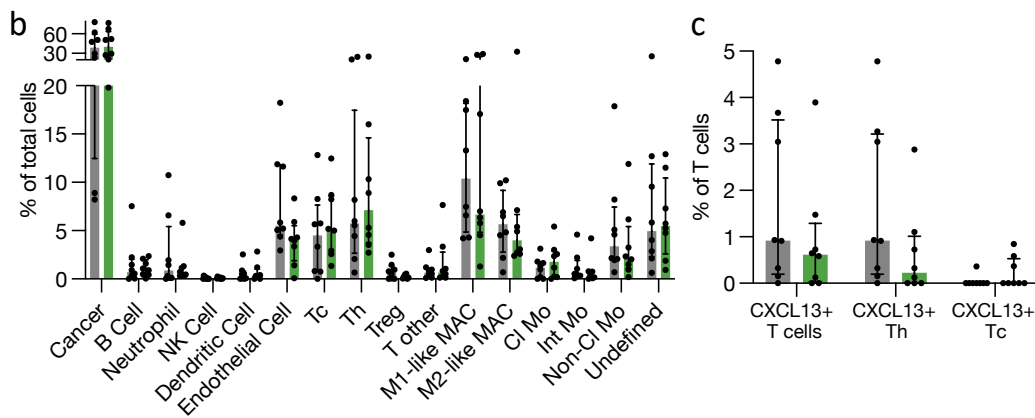

Supplement: jitc-2022-005545supp007.pdf [file jitc-2022-005545supp007.pdf]

## Supplemental Figure S4

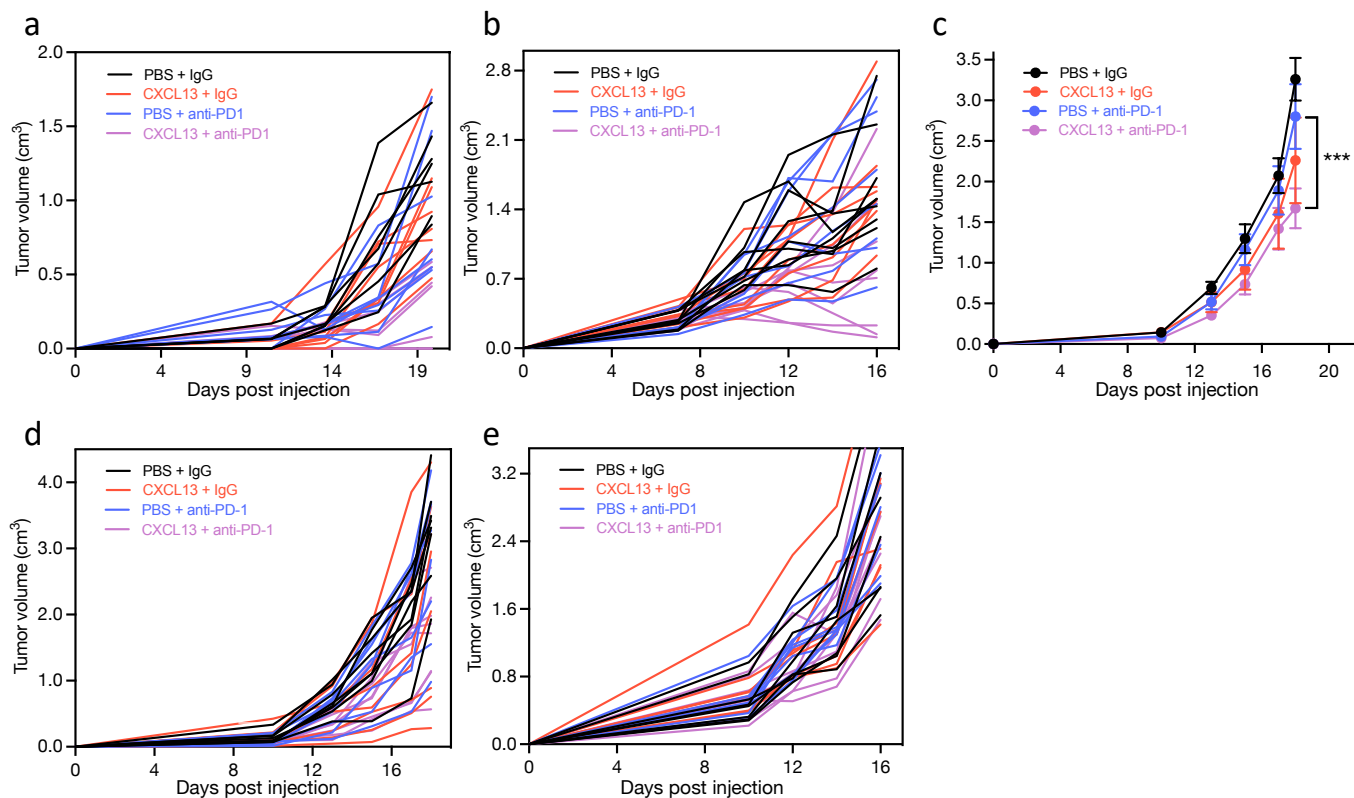

Supplement: jitc-2022-005545supp008.pdf [file jitc-2022-005545supp008.pdf]

**Supplemental Figure S5**

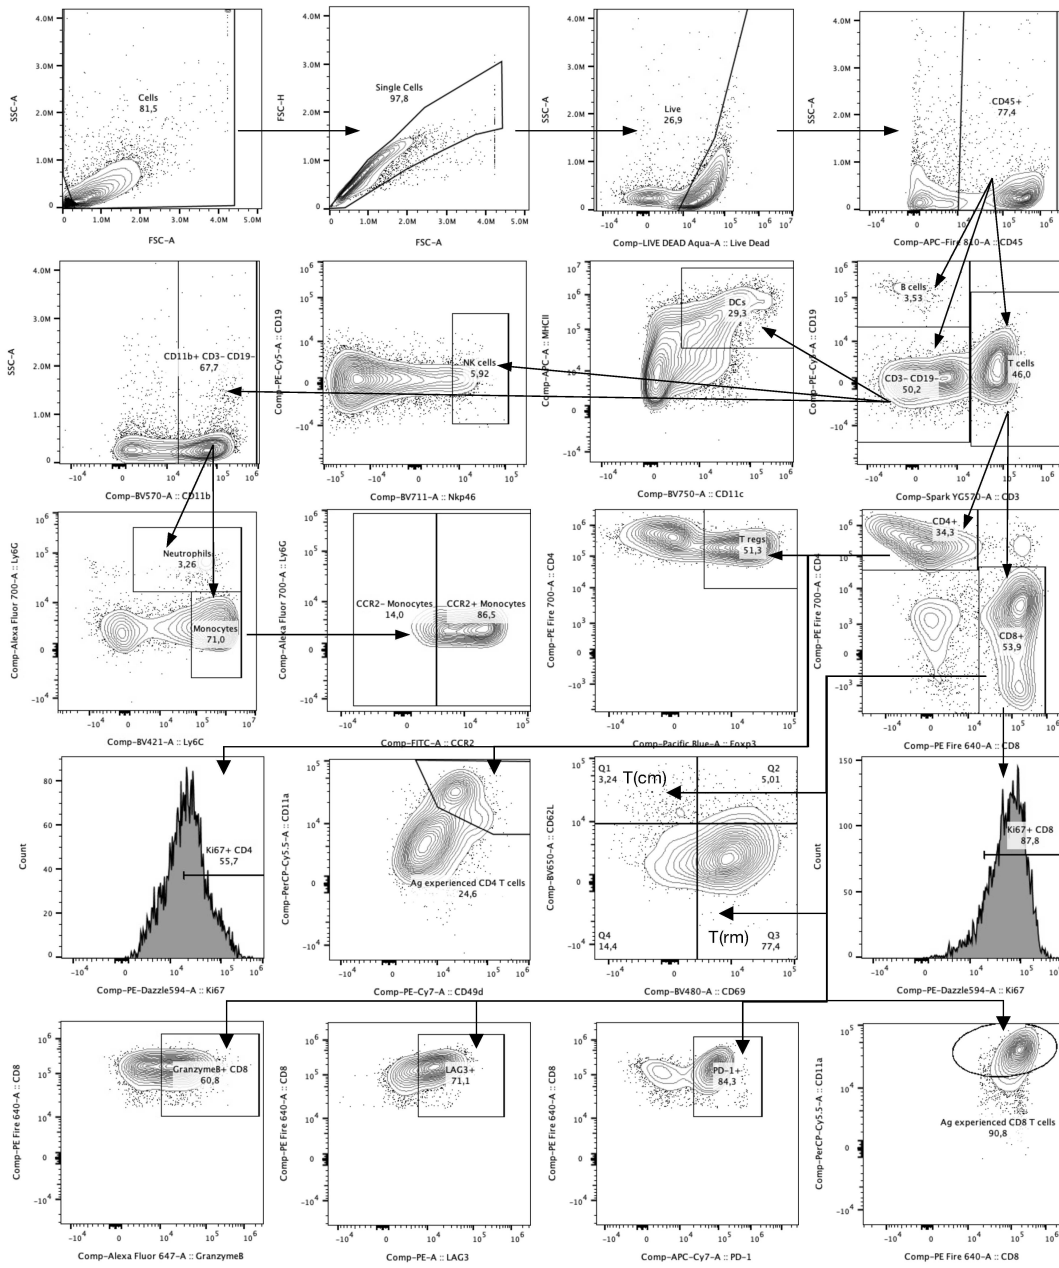

Supplement: jitc-2022-005545supp009.pdf [file jitc-2022-005545supp009.pdf]

**Supplemental Figure S6**

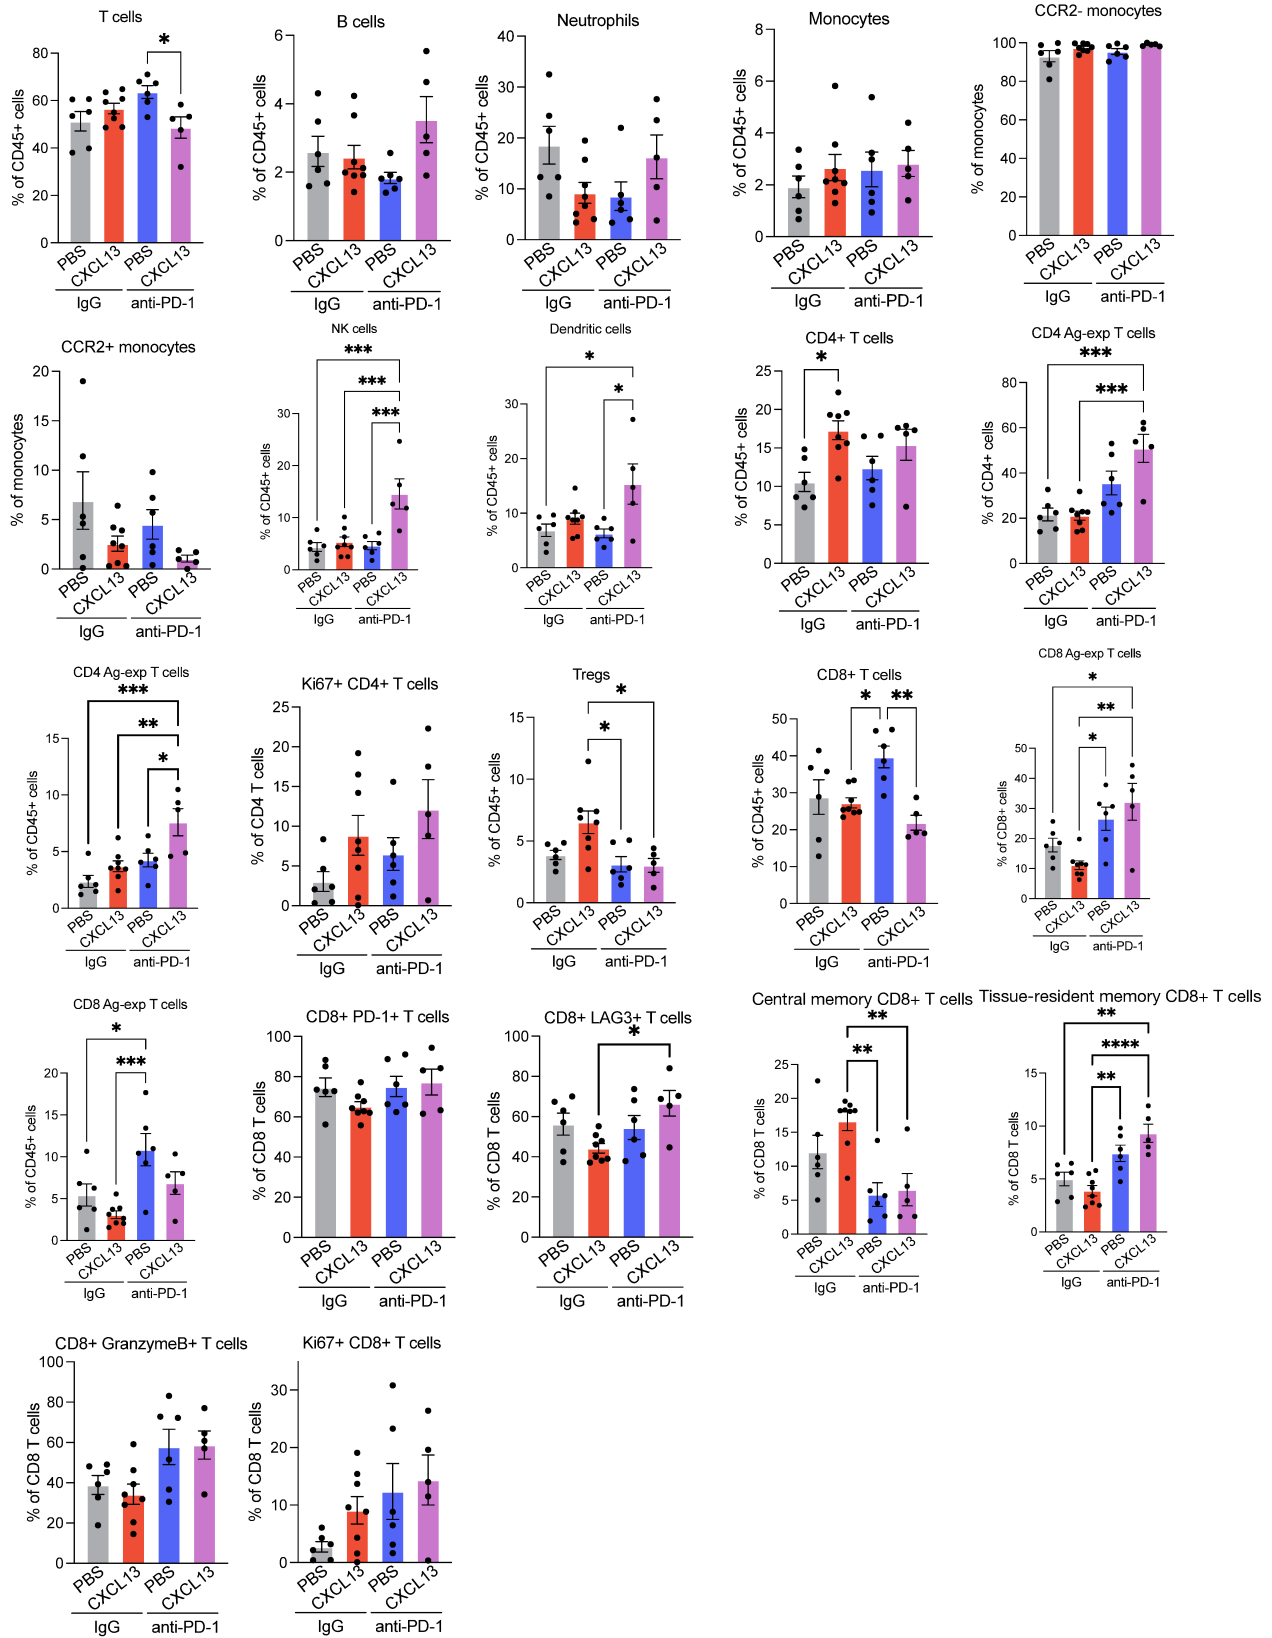

Supplement: jitc-2022-005545supp010.pdf [file jitc-2022-005545supp010.pdf]

**Supplemental Figure S7**

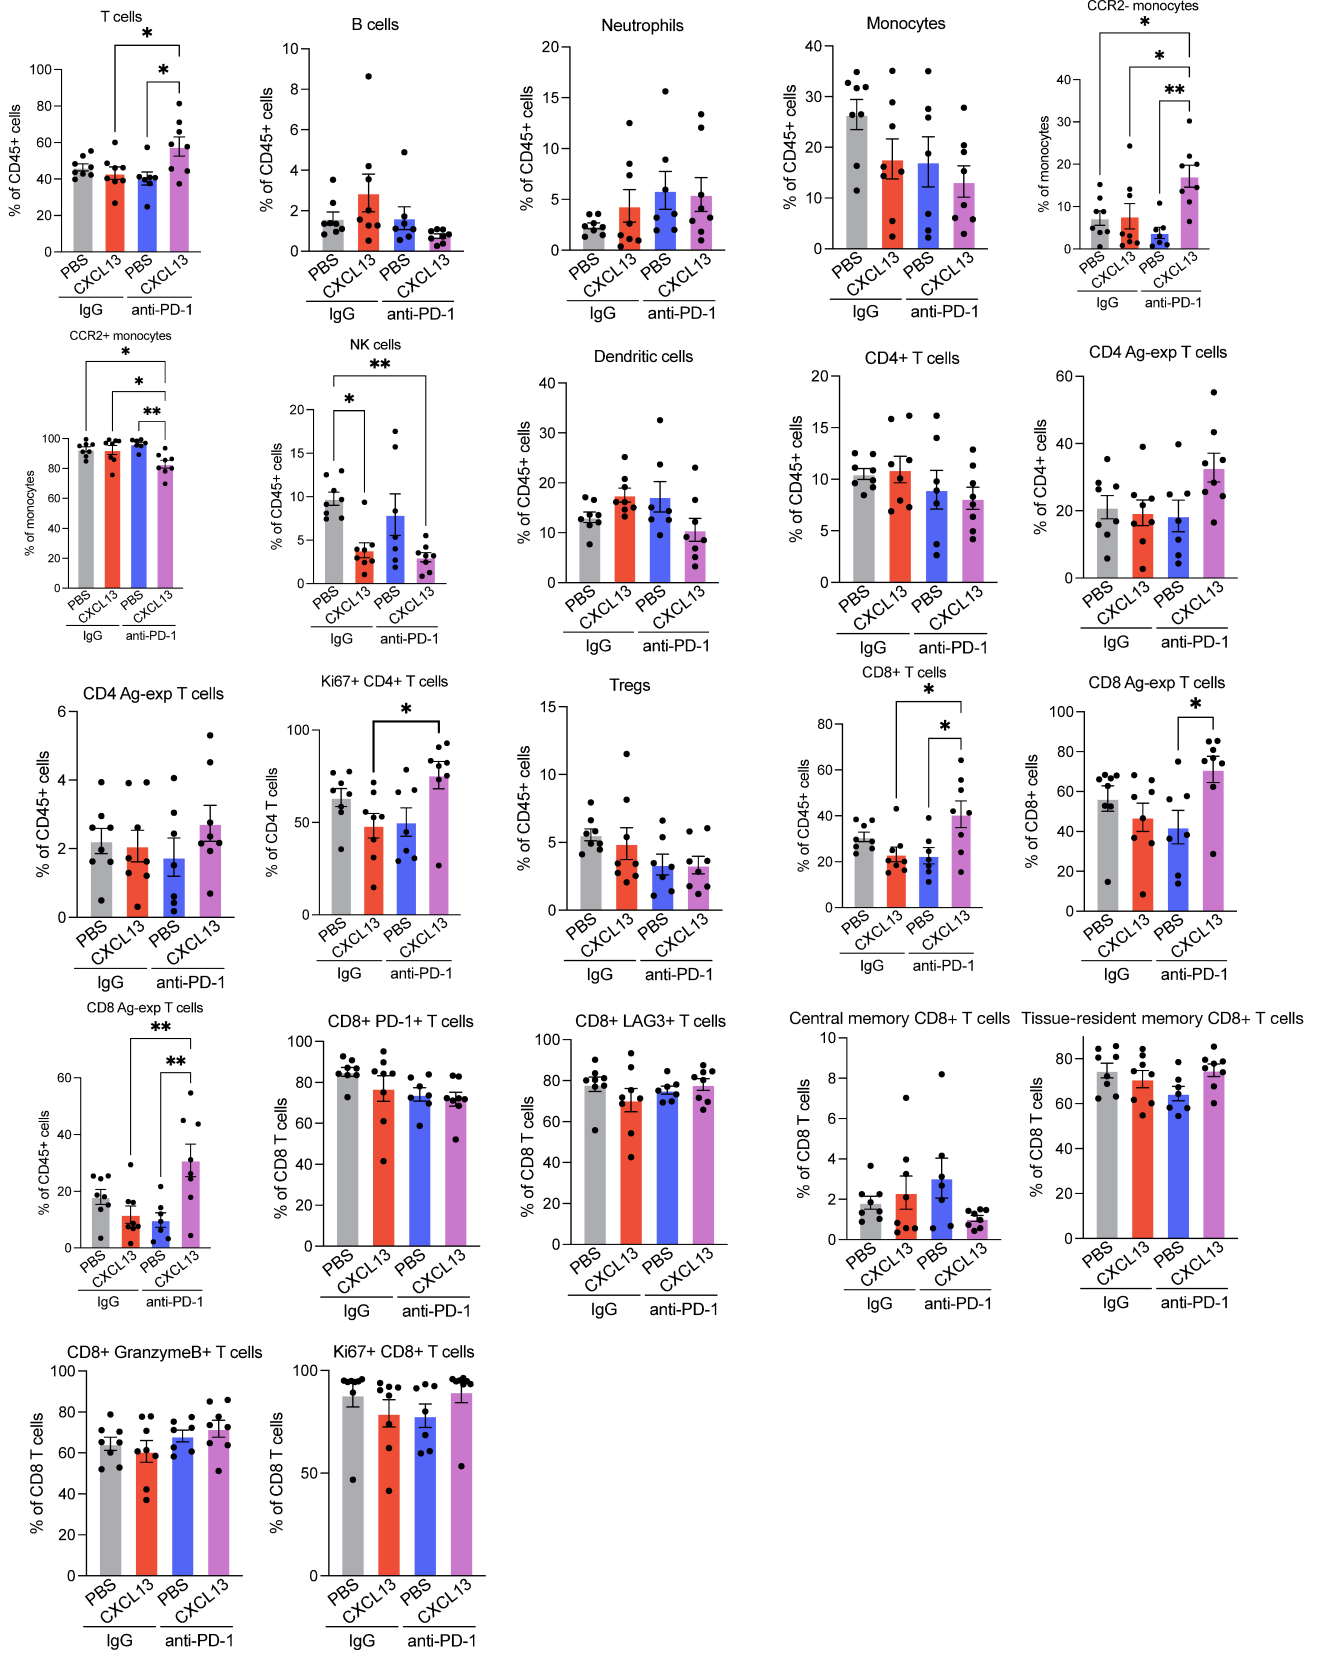

Supplement: jitc-2022-005545supp011.pdf [file jitc-2022-005545supp011.pdf]

## Supplemental Figure S8

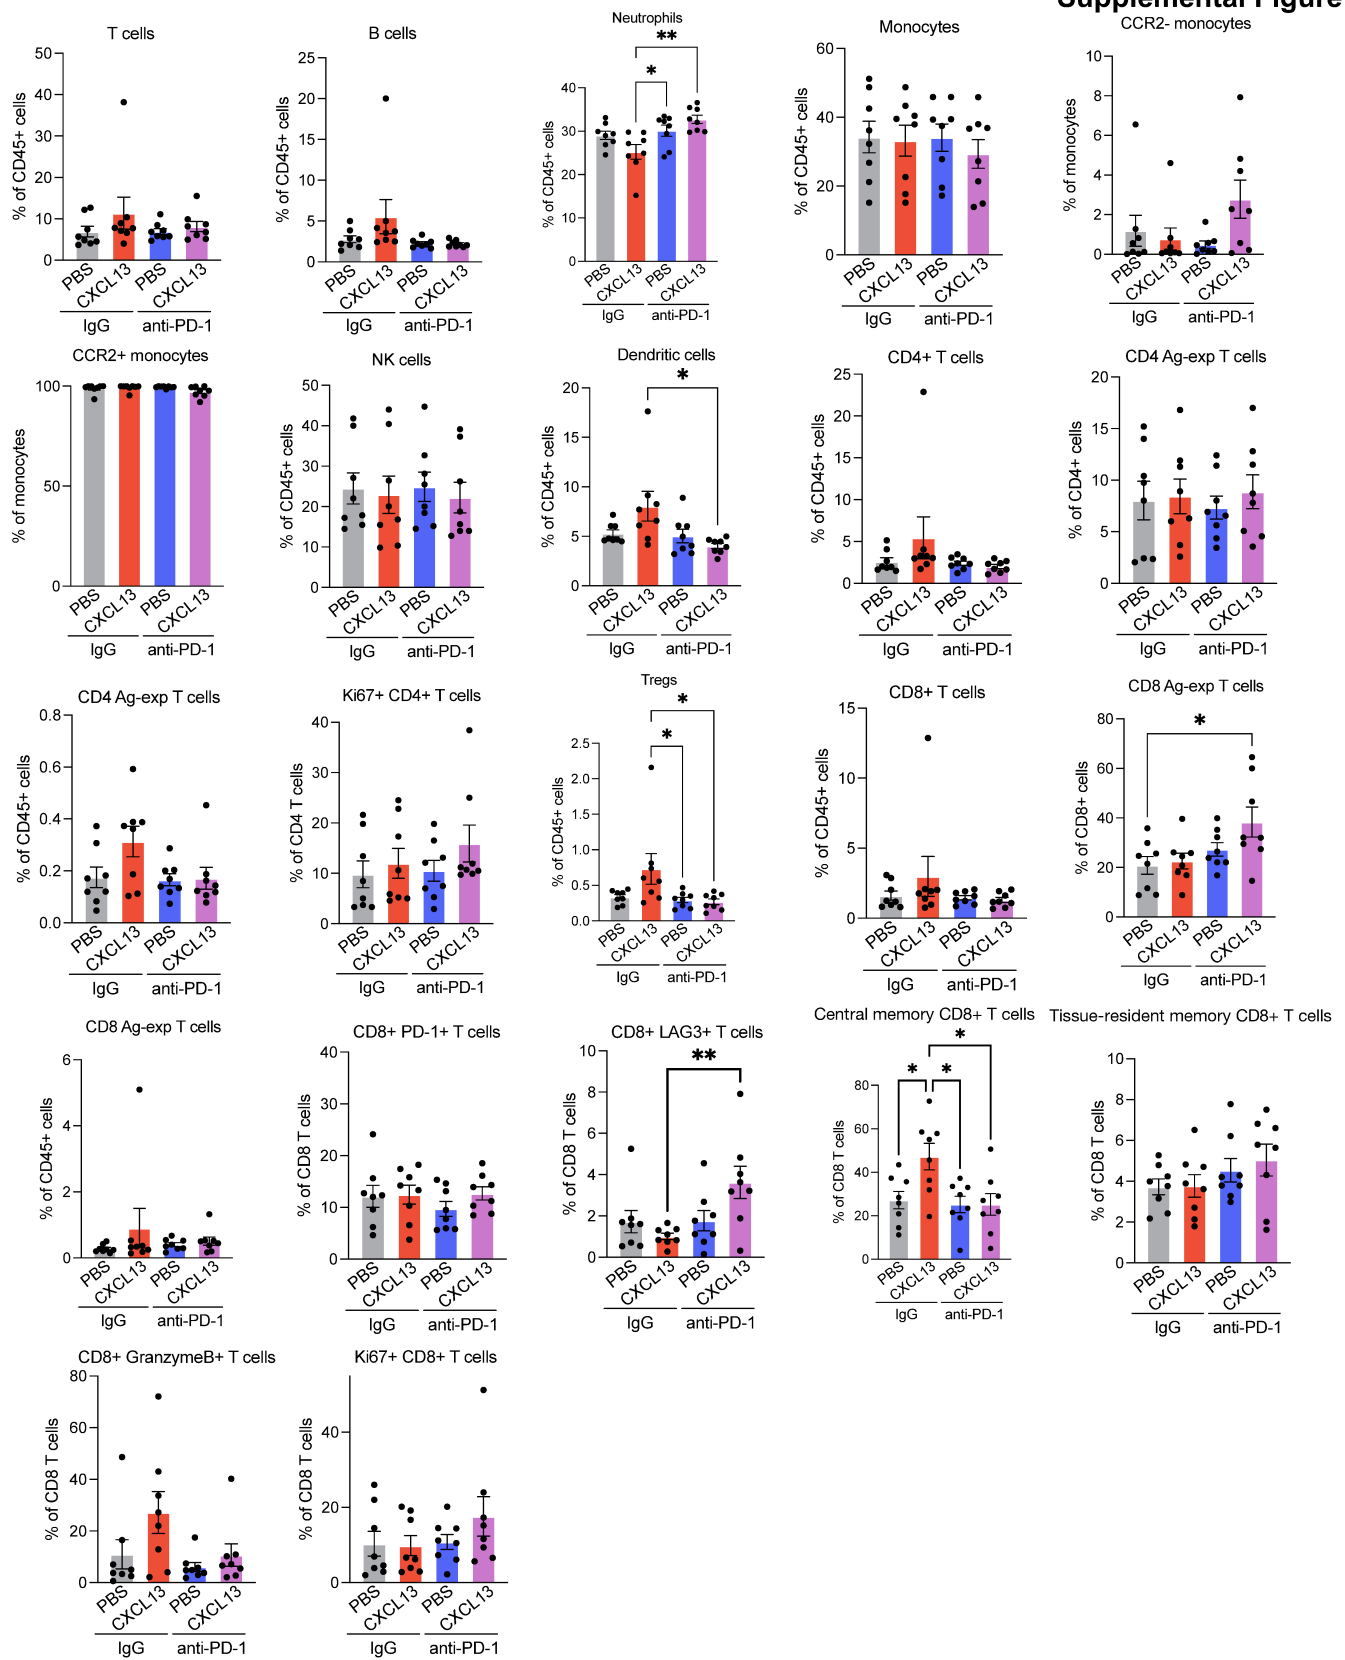

Supplement: jitc-2022-005545supp012.pdf [file jitc-2022-005545supp012.pdf]
